# Supplementary material
Source: publisher figshare collection journal article supplement (https://acs.figshare.com/ndownloader/files/4411942)
Supplement: Supplementary file 1 [file 4411942]

# Synthesis and Functionalization of Asymmetrical Benzo-fused BODIPY Dyes

Lijuan Jiao,\* Changjiang Yu, Mingming Liu, Yangchun Wu, Keping Cong, Ting Meng, Yuqing Wang and Erhong Hao

Laboratory of Functional Molecular Solids, Ministry of Education; and Anhui Key Laboratory of Functional Molecular-Based Materials, School of Chemistry and Materials Science, Anhui Normal University, Wuhu, Anhui, China 241000

Fax: (+) (+86) 553-388-3517

E-mail: [jjiao421@mail.ahnu.edu.cn](mailto:jjiao421@mail.ahnu.edu.cn)

## Contents:

|                                                                                |    |
|--------------------------------------------------------------------------------|----|
| 1. General methods.....                                                        | 2  |
| 2. Syntheses and characterizations of compounds.....                           | 3  |
| 3. Copies of $^1\text{H}$ NMR, $^{13}\text{C}$ NMR for all new compounds ..... | 11 |
| 4. High resolution mass spectroscopies for all new compounds.....              | 41 |
| 5. UV-vis and Fluorescence data for all the compounds.....                     | 56 |



## 1. General methods:

Reagents were purchased as reagent-grade and used without further purification unless otherwise stated. Solvents were used as received from commercial suppliers unless noted otherwise. THF was freshly distilled from sodium benzophenone ketyl. All reactions were performed in oven-dried or flame-dried glassware unless otherwise stated, and were monitored by TLC using 0.25 mm silica gel plates with UV indicator (60F-254).  $^1\text{H}$ - and  $^{13}\text{C}$ -NMR are obtained on a 300 MHz spectrometer at room temperature. Chemical shifts ( $\delta$ ) are given in ppm relative to  $\text{CDCl}_3$  7.26 ( $^1\text{H}$ ) and 77 ppm ( $^{13}\text{C}$ ) or TMS. High-resolution mass spectra were obtained by using EI-TOF with positive mode. The isotope peaks were matched with the calculated patterns; only the most abundant peaks for each compound are listed.

UV-visible absorption spectra were recorded on a commercial spectrophotometer (190-1100 nm scan range). Fluorescence emission spectra were recorded on a commercial spectrophotometer. The slit width was 2.5 nm for excitation and 5.0 nm emission. Relative quantum efficiencies of fluorescence of BODIPY derivatives were obtained by comparing the areas under the corrected emission spectrum of the test sample in various solvent with that of methylene blue (0.03 in MeOH)<sup>1a</sup> fluorescein (0.95 in 0.1 M NaOH aqueous solution)<sup>1b</sup> and Rhodamin B (0.49 in EtOH)<sup>1c</sup>, respectively. Non-degassed, spectroscopic grade solvents and a 10 mm quartz cuvette were used. Dilute solutions ( $0.01 < A < 0.05$ ) were used to minimize the reabsorption effects. Quantum yields were determined using the following equation<sup>2</sup>:

$$\Phi_X = \Phi_S (I_X/I_S) (A_S/A_X) (\eta_X/\eta_S)^2$$

Where  $\Phi_S$  stands for the reported quantum yield of the standard, I stands for the integrated emission spectra, A stands for the absorbance at the excitation wavelength and  $\eta$  stands for the refractive index of the solvent being used ( $\eta = 1$  when the same solvent was used for both the test sample and the standard). X subscript stands for the test sample, and S subscript stands for the standard.

Fluorescence lifetimes were measured on a combined steady-state lifetime fluorescence spectrometer and the fluorescence lifetimes were obtained from deconvolution and distribution lifetime analysis<sup>3</sup>. The fluorescence lifetime was fitted in a single exponential and all fits had  $\chi^2$  values under 1.1. The radiative rate constant was calculated using equation  $k_r = \Phi/\tau$ , and the non-radiative rate constant was calculated using equation  $k_{nr} = (1-\Phi)/\tau$ .



## 2. Syntheses and Characterizations of Compounds

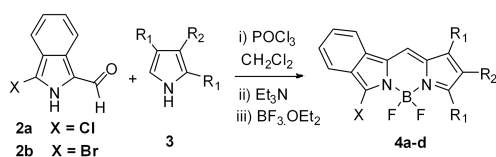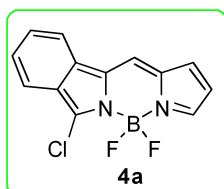

**BODIPY 4a:** To compound **2a**<sup>4</sup> (895 mg, 5 mmol) in 10 mL CH<sub>2</sub>Cl<sub>2</sub> was added pyrrole (138  $\mu$ L, 2 mmol) in 1 mL CH<sub>2</sub>Cl<sub>2</sub>, and POCl<sub>3</sub> (470  $\mu$ L, 5 mmol) in 1 mL CH<sub>2</sub>Cl<sub>2</sub> respectively, at ice-cold condition under argon. The reaction mixture was stirred at this ice-cold condition for 30 min. To the reaction mixture was added Et<sub>3</sub>N (7 mL), and the mixture was stirred for 10 min before addition of BF<sub>3</sub>·OEt<sub>2</sub> (7 mL) through syringe. The reaction mixture was left stirring for overnight, poured into 50 mL water and extracted with 30 mL CH<sub>2</sub>Cl<sub>2</sub>. Organic layers were combined, and solvent was removed under vacuum. The crude product was purified from chromatograph (silica gel, hexane/CH<sub>2</sub>Cl<sub>2</sub> = 2/1, v/v), the desired compound **4a** was obtained as brown powder in 63% yield (348 mg): <sup>1</sup>H NMR (300 MHz, CDCl<sub>3</sub>):  $\delta$  7.70 (t, J = 8.4 Hz, 2H), 7.54 (d, J = 8.4 Hz, 2H), 7.36 (d, J = 8.1 Hz, 2H), 6.78 (brs, 1H), 6.32 (brs, 1H). <sup>13</sup>C NMR (75 MHz, CDCl<sub>3</sub>):  $\delta$  147.8, 137.5, 135.6, 132.3, 131.8, 130.0, 129.5, 127.3, 124.9, 122.4, 120.9, 119.5, 115.7. HRMS (EI) Calcd. for C<sub>13</sub>H<sub>8</sub>BClF<sub>2</sub>N<sub>2</sub> [M]<sup>+</sup>: 276.0437, found 276.0435.

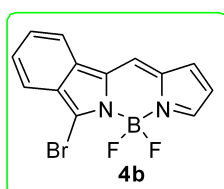

**BODIPY 4b:** By reacting compound **2b**<sup>4</sup> (224 mg, 1 mmol) with pyrrole (28  $\mu$ L, 0.4 mmol) and POBr<sub>3</sub> (29 mg, 0.1 mmol) using the same procedure described above, subsequently reacting with Et<sub>3</sub>N (1.2 mL), complexation with BF<sub>3</sub>·OEt<sub>2</sub> (1.2 mL), and purification from chromatograph (silica gel, hexane/CH<sub>2</sub>Cl<sub>2</sub> = 1/1, v/v), the desired compound **4b** was obtained as brown powder in 67% yield (86



mg).  $^1\text{H}$  NMR (300 MHz,  $\text{CDCl}_3$ ):  $\delta$  7.82 (t,  $J$  = 7.2 Hz, 2H), 7.66 (q,  $J$  = 6.9 Hz, 2H), 7.47 (t,  $J$  = 6.3 Hz, 2H), 6.90 (d,  $J$  = 3.9 Hz, 1H), 6.43 (q,  $J$  = 2.4 Hz, 1H).  $^{13}\text{C}$  NMR (75 MHz,  $\text{CDCl}_3$ ):  $\delta$  147.9, 137.5, 135.6, 132.4, 131.8, 130.0, 129.5, 127.4, 124.9, 122.5, 121.0, 119.6, 115.8. HRMS (EI) Calcd. for  $\text{C}_{13}\text{H}_8\text{BF}_2\text{N}_2^{79}\text{Br} [\text{M}]^+$ : 319.9932, found 319.9931; HRMS (EI) Calcd. for  $\text{C}_{13}\text{H}_8\text{BF}_2\text{N}_2^{81}\text{Br} [\text{M}]^+$ : 321.9912, found 321.9922.

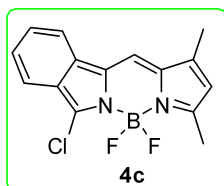

**BODIPY 4c:** To compound **2a**<sup>4</sup> (895 mg, 5 mmol) in 10 mL  $\text{CH}_2\text{Cl}_2$  was added 2,4-dimethylpyrrole (620  $\mu\text{L}$ , 5 mmol) in 1 mL  $\text{CH}_2\text{Cl}_2$  and  $\text{POCl}_3$  (470  $\mu\text{L}$ , 5 mmol) in 1 mL  $\text{CH}_2\text{Cl}_2$ , respectively at ice-cold condition under argon. The reaction mixture was stirred at this ice-cold condition for 30 min,  $\text{Et}_3\text{N}$  (7 mL) was added into the reaction mixture, the mixture was stirred for 10 min,  $\text{BF}_3\cdot\text{OEt}_2$  (7 mL) was then added through syringe. The reaction mixture was left stirring for overnight, poured into 50 mL water and extracted with 30 mL  $\text{CH}_2\text{Cl}_2$ . Organic layers were combined, and solvent was removed under vacuum. The crude product was purified from chromatograph (silica gel, hexane/ $\text{CH}_2\text{Cl}_2$  = 2/1, v/v) to give the desired compound **4c** as brown powder in 53% yield (800 mg):  $^1\text{H}$  NMR (300 MHz,  $\text{CDCl}_3$ ):  $\delta$  7.78 (d,  $J$  = 7.7 Hz, 1H), 7.64 (d,  $J$  = 7.6 Hz, 1H), 7.47 (t,  $J$  = 7.3 Hz, 1H), 7.36 (t,  $J$  = 7.5 Hz, 1H), 7.10 (s, 1H), 5.88 (s, 1H), 2.39 (s, 3H), 2.29 (s, 3H).  $^{13}\text{C}$  NMR (75 MHz,  $\text{CDCl}_3$ ):  $\delta$  154.9, 140.3, 139.8, 134.3, 132.4, 130.6, 128.5, 126.8, 126.0, 121.7, 119.1, 118.3, 117.1, 14.6, 11.3. HRMS Calcd. for  $\text{C}_{15}\text{H}_{12}\text{BClF}_2\text{N}_2$ :  $[\text{M}]^+$  304.0750, found 304.0757.

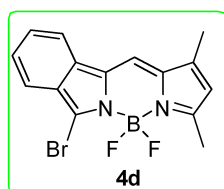

**BODIPY 4d:** By reacting compound **2b**<sup>4</sup> (224 mg, 1 mmol) with 2,4-dimethylpyrrole (124  $\mu\text{L}$ , 1 mmol) and  $\text{POBr}_3$  (284 mg, 1 mmol) using the same procedure described above, subsequently reacting with  $\text{Et}_3\text{N}$  (1.2 mL), complexation with  $\text{BF}_3\cdot\text{OEt}_2$  (1.2 mL) for 2 hours, and purification from



chromatograph (silica gel, hexane/CH<sub>2</sub>Cl<sub>2</sub> = 1/1, v/v), the desired compound **4d** was obtained as brown powder in 45% yield (157 mg). <sup>1</sup>H NMR (300 MHz, CDCl<sub>3</sub>): δ 7.78-7.65 (m, 2H), 7.50 (d, J = 7.0 Hz, 1H), 7.36 (t, J = 7.7 Hz, 1H), 7.31 (s, 1H), 6.02 (s, 1H), 2.55 (s, 3H), 2.26 (s, 3H). <sup>13</sup>C NMR (75 MHz, CDCl<sub>3</sub>): δ 130.6, 130.4, 125.9, 122.5, 121.6, 119.0, 118.9, 118.5, 118.3, 117.0, 116.8, 14.6, 11.3. HRMS (EI) Calcd. for C<sub>15</sub>H<sub>12</sub>BBrF<sub>2</sub>N<sub>2</sub> [M]<sup>+</sup>: 348.0245, found 348.0243.

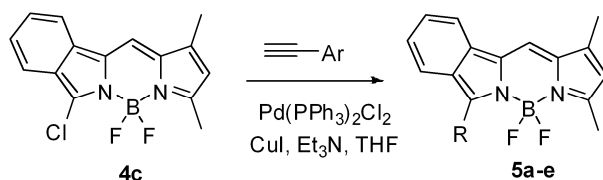

General procedure for the preparation of BODIPYs **5a-e** using sonogashira coupling reaction was described in the following using compound **5a** arylacetylene as an example.

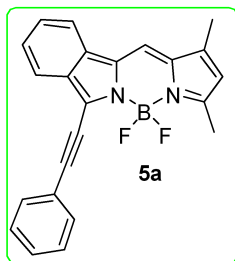

**BODIPY 5a.** To a 50 mL dry Schlenk flask were added BODIPY **4c** (61 mg, 0.2 mmol), Pd(PPh<sub>3</sub>)<sub>2</sub>Cl<sub>2</sub> (22 mg, 3 mmol%) and CuI (13 mg, 7 mmol%) in 5 mL freshly distilled THF. After freeze-thaw for three times, Et<sub>3</sub>N (0.4 mL) and phenylacetylene (110 μL, 1.0 mmol) in 1 mL THF were added through syringe into the mixture, respectively. The mixture was stirred at 65 °C for 3 h, cooled to room temperature, filtrated through Celite, and the cake was washed with CH<sub>2</sub>Cl<sub>2</sub> (3 × 20 mL). Organic layers were combined, washed with brine, dried over anhydrous MgSO<sub>4</sub>, and solvent was removed under vacuum. The crude product was purified from chromatograph (silica gel, hexane/CH<sub>2</sub>Cl<sub>2</sub> = 5/2, v/v) to give the desired compound **5a** as dark blue solid in 55% yield (41 mg): <sup>1</sup>H NMR (300 MHz, CDCl<sub>3</sub>): δ 8.17 (d, J = 7.8 Hz, 1H), 8.05-8.00 (m, 1H), 7.85 (d, J = 8.4 Hz, 1H), 7.75-7.69 (m, 2H), 7.51-7.15 (m, 4H), 6.92 (s, 1H), 6.03 (s, 1H), 2.58 (s, 3H), 2.29 (s, 3H). <sup>13</sup>C NMR (75 MHz, CDCl<sub>3</sub>): δ 139.1, 138.3, 136.5, 129.6, 129.5, 129.0, 128.4, 127.7, 126.3, 125.3, 124.5, 123.9, 119.6(3), 119.5(8), 119.4, 118.8, 117.8, 116.1, 115.3, 14.6, 11.3. HRMS (EI) Calcd. for C<sub>23</sub>H<sub>17</sub>BF<sub>2</sub>N<sub>2</sub> [M]<sup>+</sup>: 370.1453, found 370.1451.



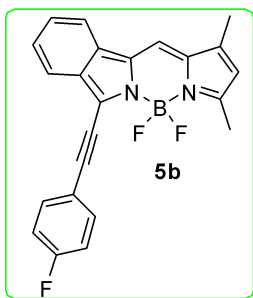

**BODIPY 5b.** By reacting BODIPY **4c** (61 mg, 0.2 mmol), Pd(PPh<sub>3</sub>)<sub>2</sub>Cl<sub>2</sub> (22 mg, 3 mmol%), CuI (13 mg, 7 mmol%), Et<sub>3</sub>N (0.4 mL) and 4-fluorophenylacetylene (240  $\mu$ L, 2.1 mmol) in 1 mL THF following the same procedure described above, BODIPY **5b** was obtained as dark blue solid in 55% yield (43 mg) after silica gel column separation (hexane/ CH<sub>2</sub>Cl<sub>2</sub> = 2/3, v/v): <sup>1</sup>H NMR (300 MHz, CDCl<sub>3</sub>):  $\delta$  8.12 (d, J = 7.9 Hz, 1H), 7.90-7.65 (m, 3H), 7.50 (t, J = 7.4 Hz, 1H), 7.39 (t, J = 7.4 Hz, 1H), 7.31 (s, 1H), 7.14-7.09 (m, 2H), 6.02 (s, 1H), 2.57 (s, 3H), 2.29 (s, 3H). <sup>13</sup>C NMR (75 MHz, CDCl<sub>3</sub>):  $\delta$  165.1, 152.9, 150.1, 137.6, 135.8, 132.8, 132.6, 131.2, 129.4, 126.3, 125.3, 124.2, 123.7, 119.4, 117.8, 116.2, 115.9, 115.3, 14.6, 11.3. HRMS (EI) Calcd. for C<sub>23</sub>H<sub>18</sub>BF<sub>3</sub>N<sub>2</sub> [M+2H]<sup>+</sup>: 390.1515, found 390.1517.

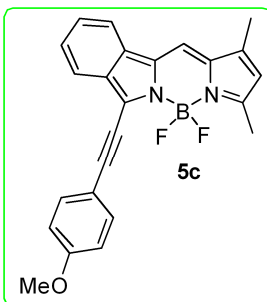

**BODIPY 5c.** By reacting BODIPY **4c** (61 mg, 0.2 mmol), Pd(PPh<sub>3</sub>)<sub>2</sub>Cl<sub>2</sub> (22 mg, 3 mmol%), CuI (13 mg, 7 mmol%), Et<sub>3</sub>N (0.4 mL) and 4-methoxyphenylacetylene (200  $\mu$ L, 1.5 mmol) in 1 mL THF following the same procedure described above, BODIPY **5c** was obtained as dark blue solid in 61% yield (49 mg) after column separation (hexane/ CH<sub>2</sub>Cl<sub>2</sub> = 2/1, v/v): <sup>1</sup>H NMR (300 MHz, CDCl<sub>3</sub>):  $\delta$  8.17 (d, J = 8.0 Hz, 1H), 7.91-7.64 (m, 4H), 7.51 (q, J = 7.4 Hz, 1H), 7.42 (q, J = 8.3 Hz, 1H), 6.97 (d, J = 7.5 Hz, 2H), 6.04 (d, J = 8.1 Hz, 1H), 3.87 (s, 3H), 2.60 (d, J = 8.3 Hz, 3H), 2.29 (s, 3H). <sup>13</sup>C NMR (75 MHz, CDCl<sub>3</sub>):  $\delta$  161.0, 155.3, 151.7, 151.3, 139.2, 135.9, 129.4, 126.3, 125.9, 124.0, 122.6, 119.4, 119.1, 118.4, 117.3, 115.9, 114.6, 114.4, 114.2, 55.4, 14.6, 11.3. HRMS (EI) Calcd. for C<sub>24</sub>H<sub>19</sub>BF<sub>2</sub>N<sub>2</sub>O [M]<sup>+</sup>: 400.1559, found 400.1556.



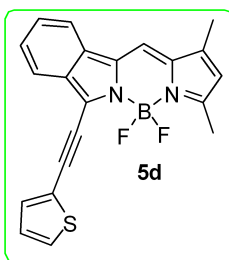

**BODIPY 5d.** By reacting BODIPY **4c** (61 mg, 0.2 mmol), Pd(PPh<sub>3</sub>)<sub>2</sub>Cl<sub>2</sub> (22 mg, 3 mmol%), CuI (13 mg, 7 mmol%), Et<sub>3</sub>N (0.4 mL) and 2-ethylenethiophene (216  $\mu$ L, 2.2 mmol) in 1 mL THF following the same procedure described above, BODIPY **5d** was obtained as dark blue solid in 53% yield (40 mg) after column separation (hexane/ CH<sub>2</sub>Cl<sub>2</sub> = 2/1, v/v): <sup>1</sup>H NMR (300 MHz, CDCl<sub>3</sub>):  $\delta$  8.06 (d, J = 8.0 Hz, 1H), 7.82-7.75 (m, 2H), 7.53-7.34 (m, 4H), 7.09 (brs, 1H), 6.00 (s, 1H), 2.56 (s, 3H), 2.25 (s, 3H). <sup>13</sup>C NMR (75 MHz, CDCl<sub>3</sub>):  $\delta$  152.8, 149.9, 142.5, 137.4, 135.7, 132.6, 131.6, 131.0, 129.8, 129.5, 129.1, 128.2, 127.9, 126.3, 123.6, 119.4, 118.6, 117.7, 114.9, 14.6, 11.3. HRMS (EI) Calcd. for C<sub>21</sub>H<sub>17</sub>BSF<sub>2</sub>N<sub>2</sub> [M+2H]<sup>+</sup>: 378.1174, found 378.1176. HRMS (EI) Calcd. for C<sub>21</sub>H<sub>15</sub>BF<sub>2</sub>N<sub>2</sub>S m/z: 376.1017, found 376.1047.

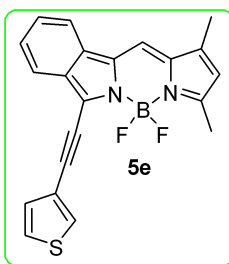

**BODIPY 5e.** By reacting BODIPY **4c** (61 mg, 0.2 mmol), Pd(PPh<sub>3</sub>)<sub>2</sub>Cl<sub>2</sub> (22 mg, 3 mmol%), CuI (13 mg, 7 mmol%), NEt<sub>3</sub> (0.4 mL) and 3-ethylenethiophene (216  $\mu$ L, 2.2 mmol) in 1 mL THF following the same procedure described above, BODIPY **5e** was obtained as dark blue solid in 64% yield (48 mg) after column separation (hexane/ CH<sub>2</sub>Cl<sub>2</sub> = 2/1, v/v): <sup>1</sup>H NMR (300 MHz, CDCl<sub>3</sub>):  $\delta$  8.14 (d, J = 7.9 Hz, 1H), 7.82 (brs, 2H), 7.56-7.49 (m, 2H), 7.39 (brs, 2H), 7.31 (brs, 1H), 6.03 (s, 1H), 2.57 (s, 3H), 2.29 (s, 3H). <sup>13</sup>C NMR (75 MHz, CDCl<sub>3</sub>):  $\delta$  152.5, 150.8, 139.9, 133.0, 132.0, 129.4, 128.6, 128.5, 127.7, 126.8, 126.3, 125.5, 125.4, 123.8, 119.5, 117.6, 115.0, 111.0, 14.6, 11.3. HRMS (EI) Calcd. for C<sub>21</sub>H<sub>17</sub>BF<sub>2</sub>N<sub>2</sub>S [M+2H]<sup>+</sup>: 378.1174, found 378.1170.

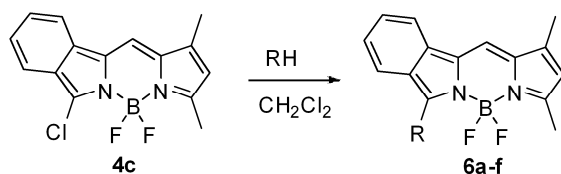



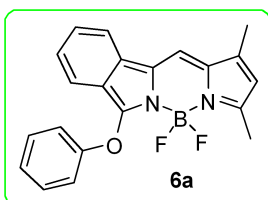

**BODIPY 6a.** To a 50 mL dry Schlenk flask were added BODIPY **4c** (40 mg, 0.13 mmol) and phenol (61 mg, 0.65 mmol) in 10 mL CH<sub>2</sub>Cl<sub>2</sub>. Then K<sub>2</sub>CO<sub>3</sub> (138 mg, 1 mmol) was added and the reaction mixture was stirred at room temperature for 10 min, poured into water and extracted with CH<sub>2</sub>Cl<sub>2</sub> (3 × 20 mL). Organic layers were combined, solvent was removed under vacuum, the crude product was purified from chromatograph (silica gel, hexane/CH<sub>2</sub>Cl<sub>2</sub> = 2/1, v/v), and the desired compound **6a** was obtained as powder in 85% yield (41 mg). <sup>1</sup>H NMR (300 MHz, CDCl<sub>3</sub>): δ 7.70 (d, J = 7.8 Hz, 1H), 7.37 (d, J = 6.6 Hz, 2H), 7.28 (d, J = 7.8 Hz, 3H), 7.19 (s, 1H), 6.94 (t, J = 7.5 Hz, 2H), 6.50 (d, J = 8.1 Hz, 1H), 5.89 (s, 1H), 2.45 (s, 3H), 2.20 (s, 3H). <sup>13</sup>C NMR (75 MHz, CDCl<sub>3</sub>): δ 154.6, 149.1, 136.7, 134.7, 130.8, 130.2, 126.5, 125.4, 123.5, 123.2, 120.2, 120.0, 119.5, 116.2, 114.9, 14.2, 11.2. HRMS (EI) Calcd. for C<sub>21</sub>H<sub>17</sub>BF<sub>2</sub>N<sub>2</sub>O [M]<sup>+</sup>: 362.1402, found 362.1406.

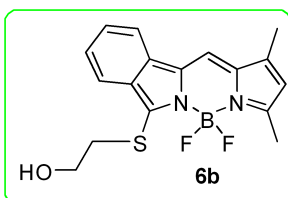

**Compound 6b.** To a 50 mL dry Schlenk flask were added BODIPY **4c** (40 mg, 0.13 mmol), and 100 equiv of 2-hydroxy-1-ethanethiol (0.9 mL, 13 mmol) in 10 mL CH<sub>2</sub>Cl<sub>2</sub>. Then 0.5 mL NEt<sub>3</sub> was added and the reaction mixture was stirred at room temperature for 24 h, poured into water and extracted CH<sub>2</sub>Cl<sub>2</sub> (3 × 20 mL). Organic layers were combined, solvent was removed under vacuum, the crude product was purified from chromatograph (silica gel, hexane/ CH<sub>2</sub>Cl<sub>2</sub> = 1/2, v/v), and the desired compound **6b** was obtained as powder in 60% yield (27 mg). <sup>1</sup>H NMR (300 MHz, CDCl<sub>3</sub>): δ 7.86 (t, J = 8.8 Hz, 2H), 7.52 (t, J = 7.0 Hz, 1H), 7.38 (t, J = 7.8 Hz, 2H), 6.07 (s, 1H), 3.66 (s, 2H), 3.37 (s, 2H), 2.57 (s, 3H), 2.30 (s, 3H). <sup>13</sup>C NMR (75 MHz, CDCl<sub>3</sub>): δ 156.7, 147.6, 140.2, 134.6, 133.1, 129.8, 128.9, 125.8, 122.5, 119.4, 118.8, 117.0, 116.6, 61.2, 40.3, 14.8, 11.4. HRMS (EI) Calcd. for C<sub>17</sub>H<sub>17</sub>BF<sub>2</sub>N<sub>2</sub>OS [M-HF]<sup>+</sup>: 326.1064, found 326.1060.



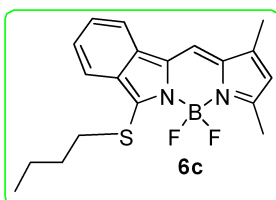

**BODIPY 6c:** To a 50 mL dry Schlenk flask were added BODIPY **4c** (61 mg, 0.2 mmol) and butanethiol (214  $\mu$ L, 2 mmol) in 10 mL  $\text{CH}_2\text{Cl}_2$ . Then 0.5 mL  $\text{NEt}_3$  was added and the reaction mixture was stirred at room temperature for 6 h, poured into water and extracted with  $\text{CH}_2\text{Cl}_2$  ( $3 \times 20$  mL). Organic layers were combined, solvent was removed under vacuum, the crude product was purified from chromatograph (silica gel, hexane/  $\text{CH}_2\text{Cl}_2$  = 2/1, v/v), and the desired compound **6c** was obtained as powder in 87% yield (62 mg).  $^1\text{H}$  NMR (300 MHz,  $\text{CDCl}_3$ ):  $\delta$  7.89 (d,  $J$  = 8.1 Hz, 1H), 7.80 (d,  $J$  = 8.0 Hz, 1H), 7.50 (t,  $J$  = 7.3 Hz, 1H), 7.34 (t,  $J$  = 7.6 Hz, 1H), 7.26 (s, 1H), 6.01 (s, 1H), 3.39 (t,  $J$  = 7.4 Hz, 2H), 2.55 (s, 3H), 2.27 (s, 3H), 1.74 (t,  $J$  = 7.3 Hz, 2H), 1.52 (t,  $J$  = 7.3 Hz, 2H), 0.93 (t,  $J$  = 7.2 Hz, 3H).  $^{13}\text{C}$  NMR (75 MHz,  $\text{CDCl}_3$ ):  $\delta$  153.5, 151.7, 138.0, 134.8, 133.0, 132.2, 129.7, 129.5, 125.6, 123.0, 119.2, 117.8, 115.3, 35.4, 32.3, 21.8, 14.6, 13.6, 11.3. HRMS (EI) Calcd. for  $\text{C}_{19}\text{H}_{21}\text{BF}_2\text{N}_2\text{S}$   $[\text{M}]^+$ : 358.1487, found 358.1481.

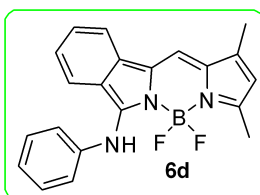

**BODIPY 6d:** By reacting BODIPY **4c** (40 mg, 0.13 mmol) and aniline (59  $\mu$ L, 0.65 mmol) using the procedure described above for 10 min at room temperature and purified using chromatograph (silica gel, hexane/  $\text{CH}_2\text{Cl}_2$  = 2/1, v/v), the desired compound **6d** was obtained as powder in 91% yield (43 mg).  $^1\text{H}$  NMR (300 MHz,  $\text{CDCl}_3$ ):  $\delta$  8.39 (brs, 1H), 7.76 (d,  $J$  = 7.9 Hz, 1H), 7.47-7.44 (m, 6H), 7.04-7.00 (m, 2H), 6.79 (d,  $J$  = 8.2 Hz, 1H), 5.92 (s, 1H), 2.49 (s, 3H), 2.24 (s, 3H).  $^{13}\text{C}$  NMR (75 MHz,  $\text{CDCl}_3$ ):  $\delta$  131.1, 129.8, 128.4, 128.1, 126.4, 125.6, 124.7, 119.6, 114.2, 108.4, 13.8, 11.0. HRMS (EI) Calcd. for  $\text{C}_{21}\text{H}_{18}\text{BF}_2\text{N}_3$   $[\text{M}]^+$ : 361.1562, found 361.1570.



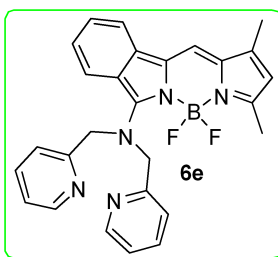

BODIPY **6e**: By reacting BODIPY **4c** (40 mg, 0.13 mmol) and di(2-pyridylmethyl)amine (DPA) (40 mg, 0.20 mmol) using the procedure described above for 10 min at room temperature and purified using chromatograph (silica gel, CH<sub>2</sub>Cl<sub>2</sub>), the desired compound **6e** was obtained as powder in 95% yield (58 mg). <sup>1</sup>H NMR (300 MHz, CDCl<sub>3</sub>): δ 8.53 (brs, 2H), 7.89 (d, J = 8.0 Hz, 1H), 7.79 (d, J = 7.7 Hz, 1H), 7.71 (t, J = 7.2 Hz, 2H), 7.48 (d, J = 6.4 Hz, 3H), 7.21 (brs, 3H), 7.10 (s, 1H), 5.95 (s, 1H), 5.32 (s, 4H), 2.52 (s, 3H), 2.25 (s, 3H). <sup>13</sup>C NMR (75 MHz, CDCl<sub>3</sub>): δ 160.4, 156.5, 149.1, 144.1, 137.4, 137.3, 130.6, 129.3, 128.6, 128.2, 126.9, 125.9, 125.0, 122.7, 122.6, 119.2, 114.8, 109.9, 58.2, 14.1, 11.0. HRMS (EI) Calcd. for C<sub>27</sub>H<sub>24</sub>BF<sub>2</sub>N<sub>5</sub> [M]<sup>+</sup>: 467.2093, found 467.2099.

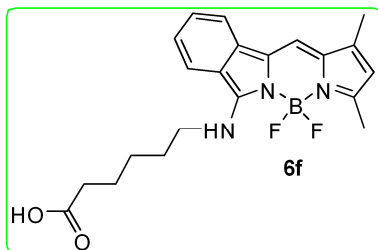

BODIPY **6f**: By reacting BODIPY **4c** (61 mg, 0.2 mmol) and 6-aminocaproic acid (132 mg, 1.0 mmol) using the procedure described above for 10 h at room temperature and purified using chromatograph (silica gel, hexane/EtOAc = 2/1, v/v), the desired compound **6f** was obtained as powder in 63% yield (50 mg). <sup>1</sup>H NMR (300 MHz, CDCl<sub>3</sub>): δ 7.82 (d, J = 7.9 Hz, 1H), 7.76 (d, J = 7.6 Hz, 1H), 7.54 (t, J = 7.0 Hz, 1H), 7.32 (t, J = 7.4 Hz, 1H), 6.87 (s, 1H), 6.81 (brs, 1H), 5.88 (s, 1H), 3.85 (d, J = 5.5 Hz, 2H), 2.45 (s, 3H), 2.42 (s, 2H), 2.21 (s, 3H), 1.87 (d, J = 6.3 Hz, 2H), 1.74 (d, J = 6.8 Hz, 2H), 1.57 (s, 2H), 1.26 (brs, 1H). <sup>13</sup>C NMR (75 MHz, CDCl<sub>3</sub>): δ 179.0, 156.8, 140.5, 137.8, 131.3, 128.5, 127.3, 126.4, 126.1, 124.6, 123.9, 119.9, 113.6, 106.3, 44.4, 34.1, 29.6, 25.9, 24.2, 13.8, 11.0. HRMS (EI) Calcd. for C<sub>21</sub>H<sub>24</sub>BF<sub>2</sub>N<sub>3</sub>O<sub>2</sub> [M- HF]<sup>+</sup>: 379.1867, found 379.1858.



### 3. Copies of $^1\text{H}$ NMR and $^{13}\text{C}$ NMR spectra for all new compounds

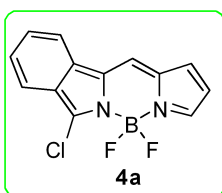

$^1\text{H}$  NMR compound **4a** in  $\text{CDCl}_3$

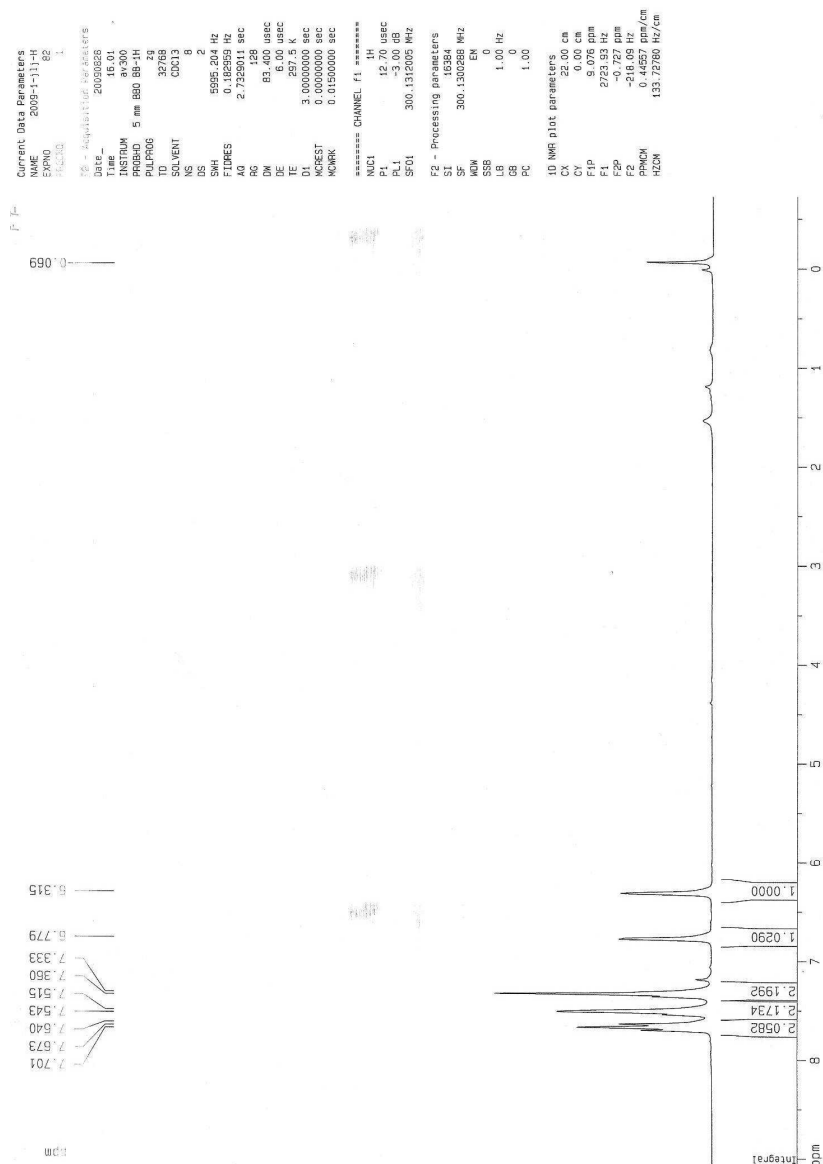



<sup>13</sup>C NMR of compound **4a** in CDCl<sub>3</sub>

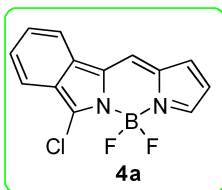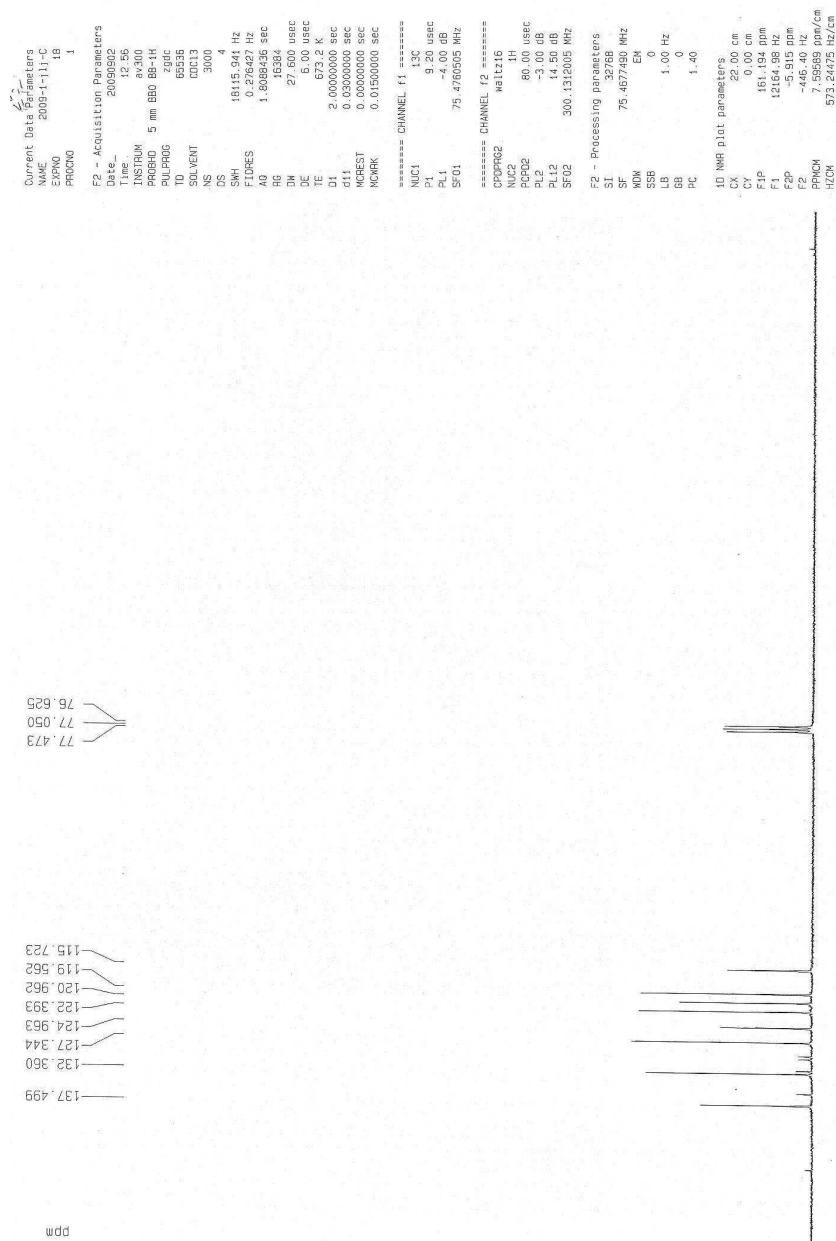



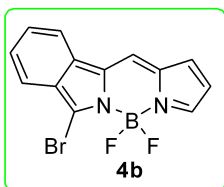

$^1\text{H}$  NMR compound **4b** in  $\text{CDCl}_3$

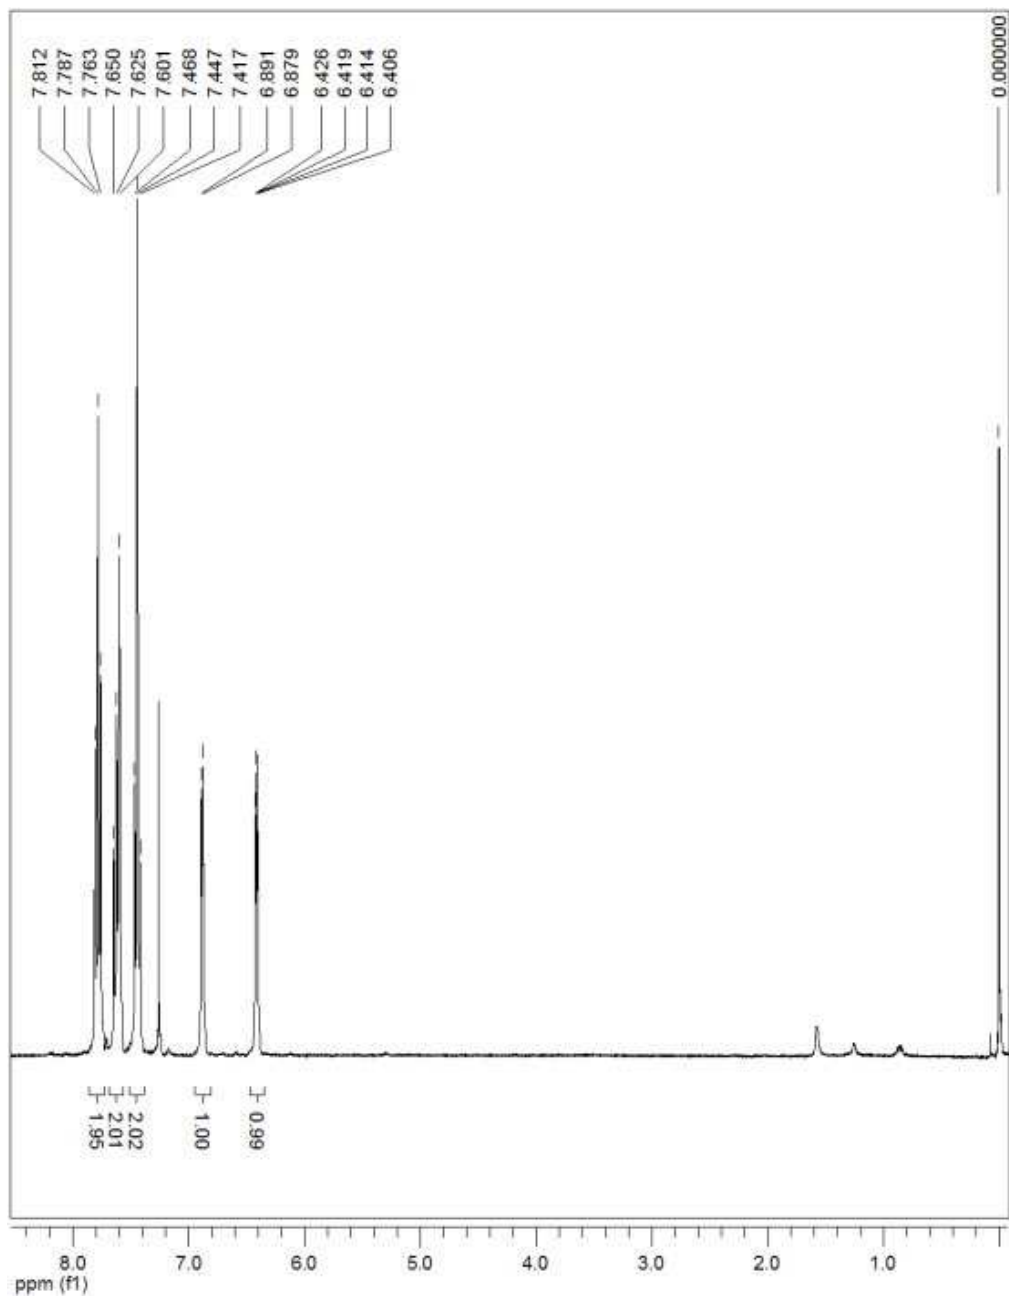



$^{13}\text{C}$  NMR of compound **4b** in  $\text{CDCl}_3$

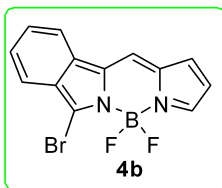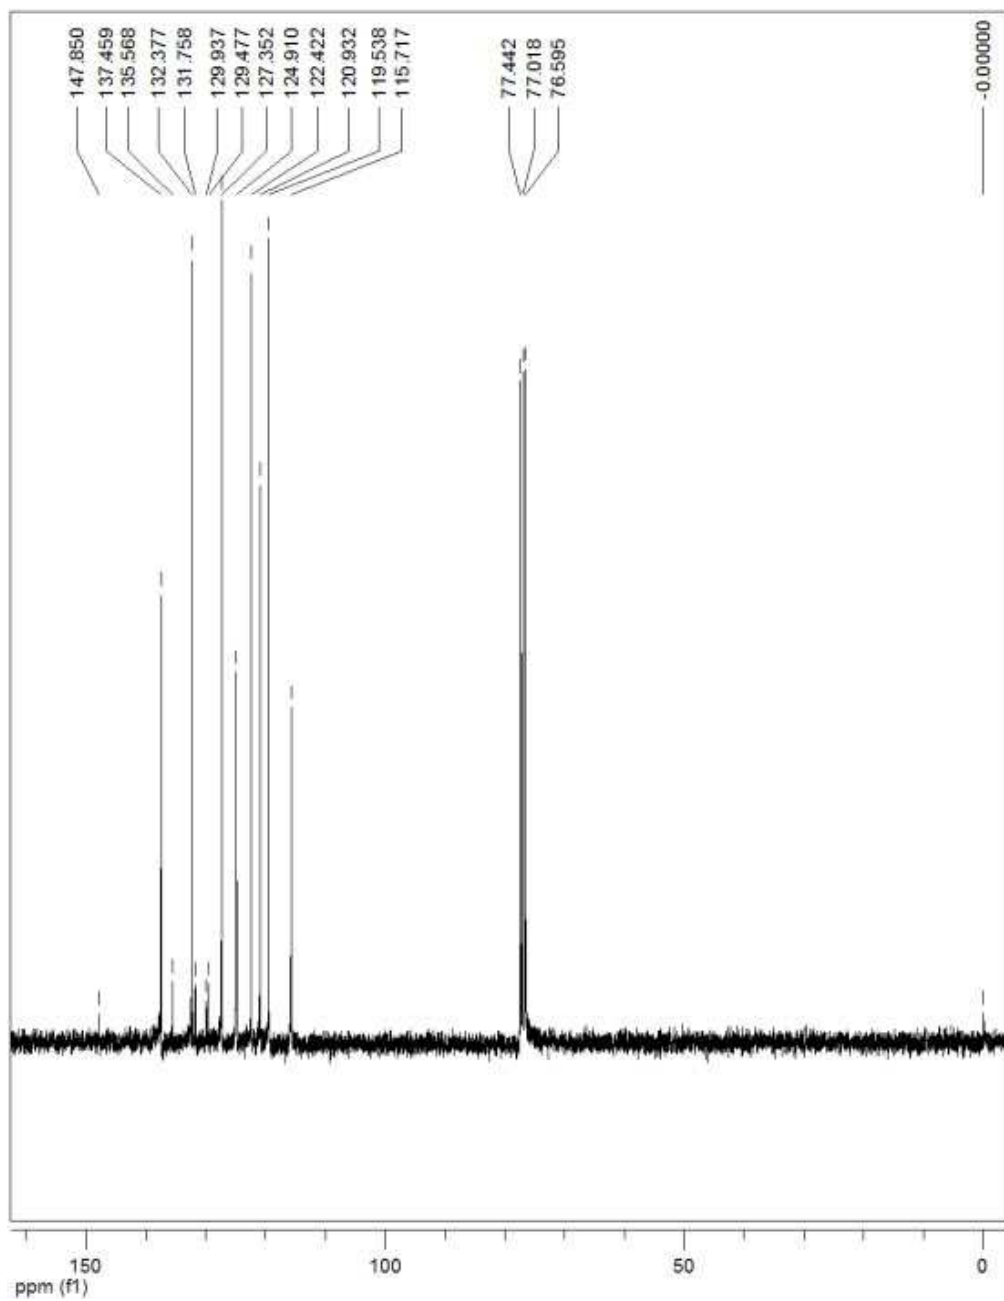



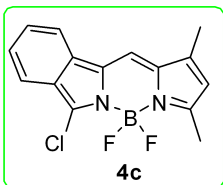

$^1\text{H}$  NMR compound **4c** in  $\text{CDCl}_3$

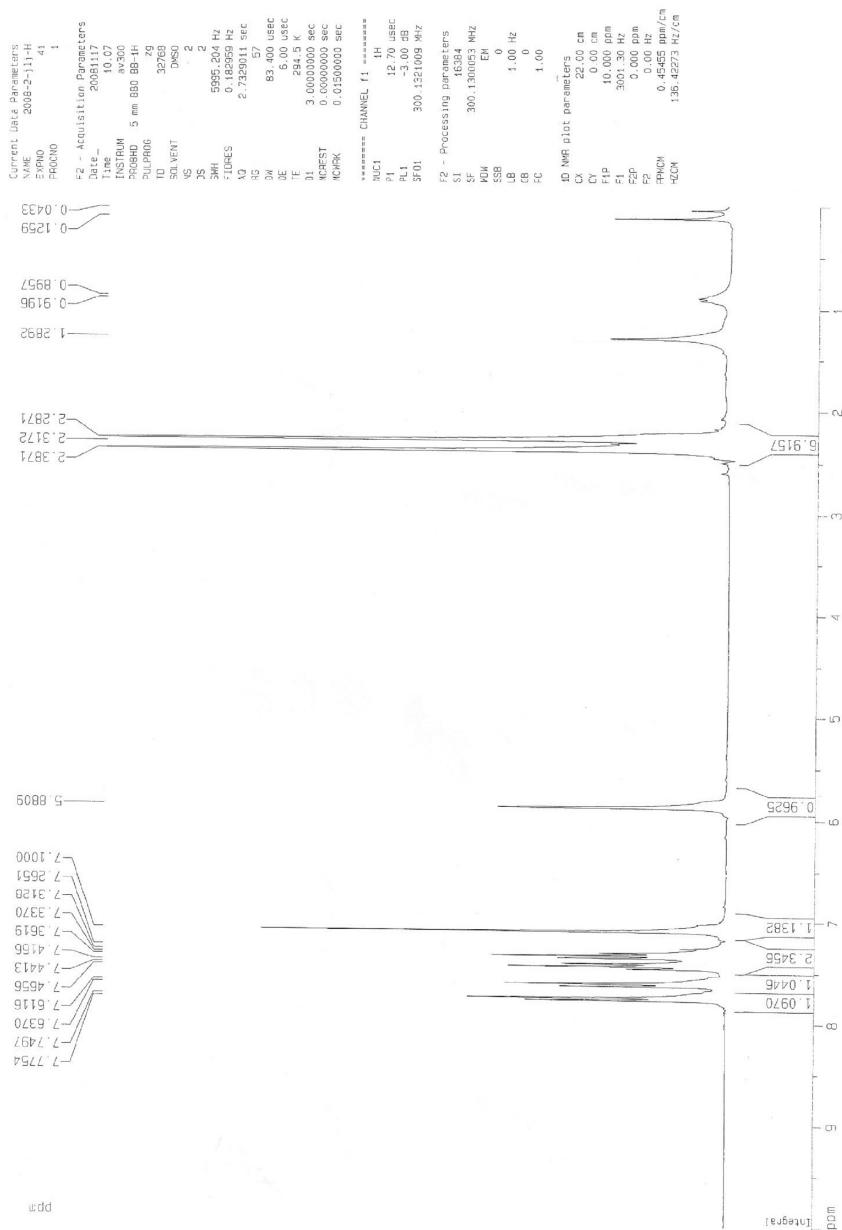



<sup>13</sup>C NMR of compound **4c** in CDCl<sub>3</sub>

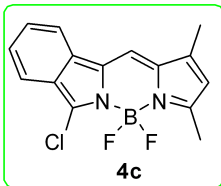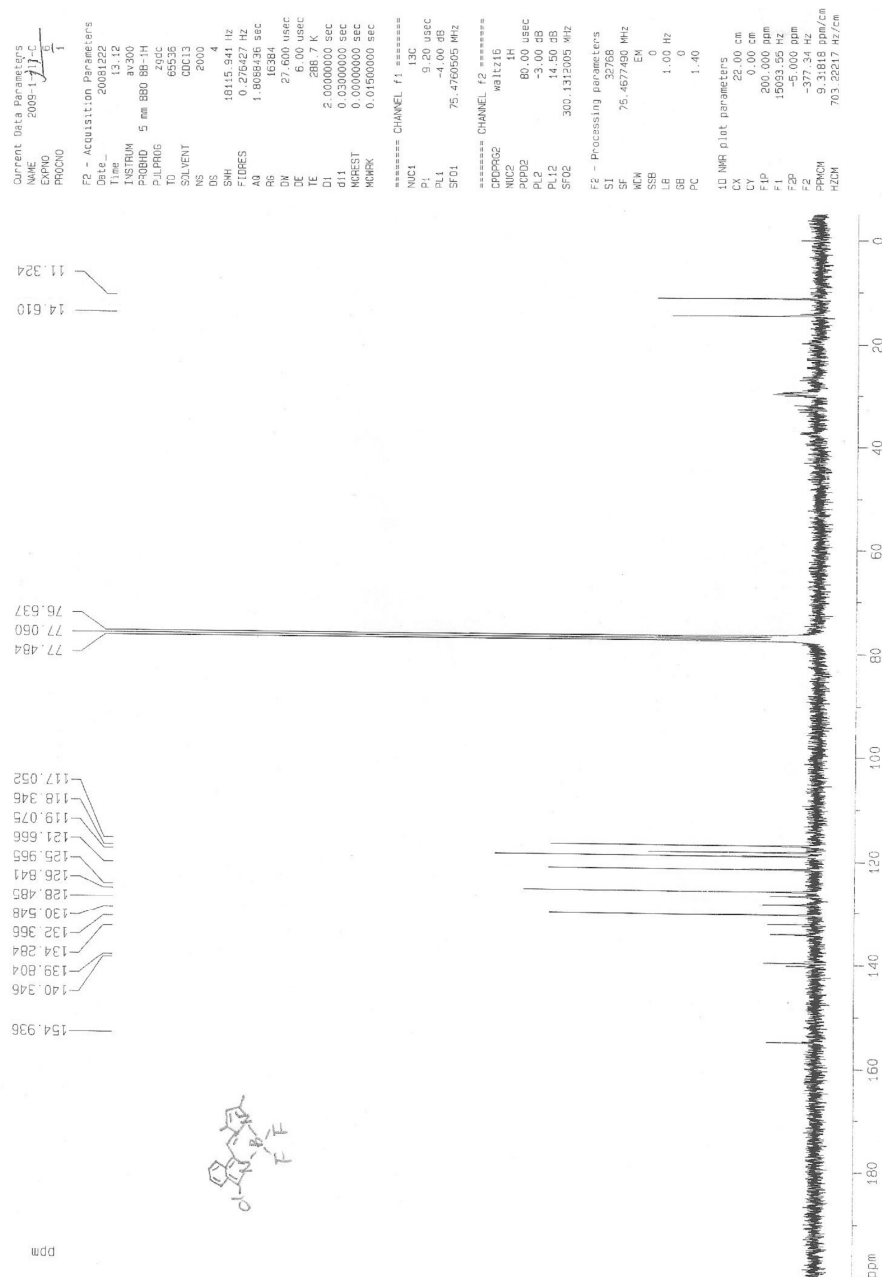



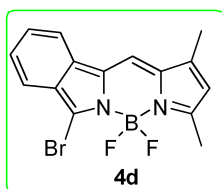

$^1\text{H}$  NMR compound **4d** in  $\text{CDCl}_3$

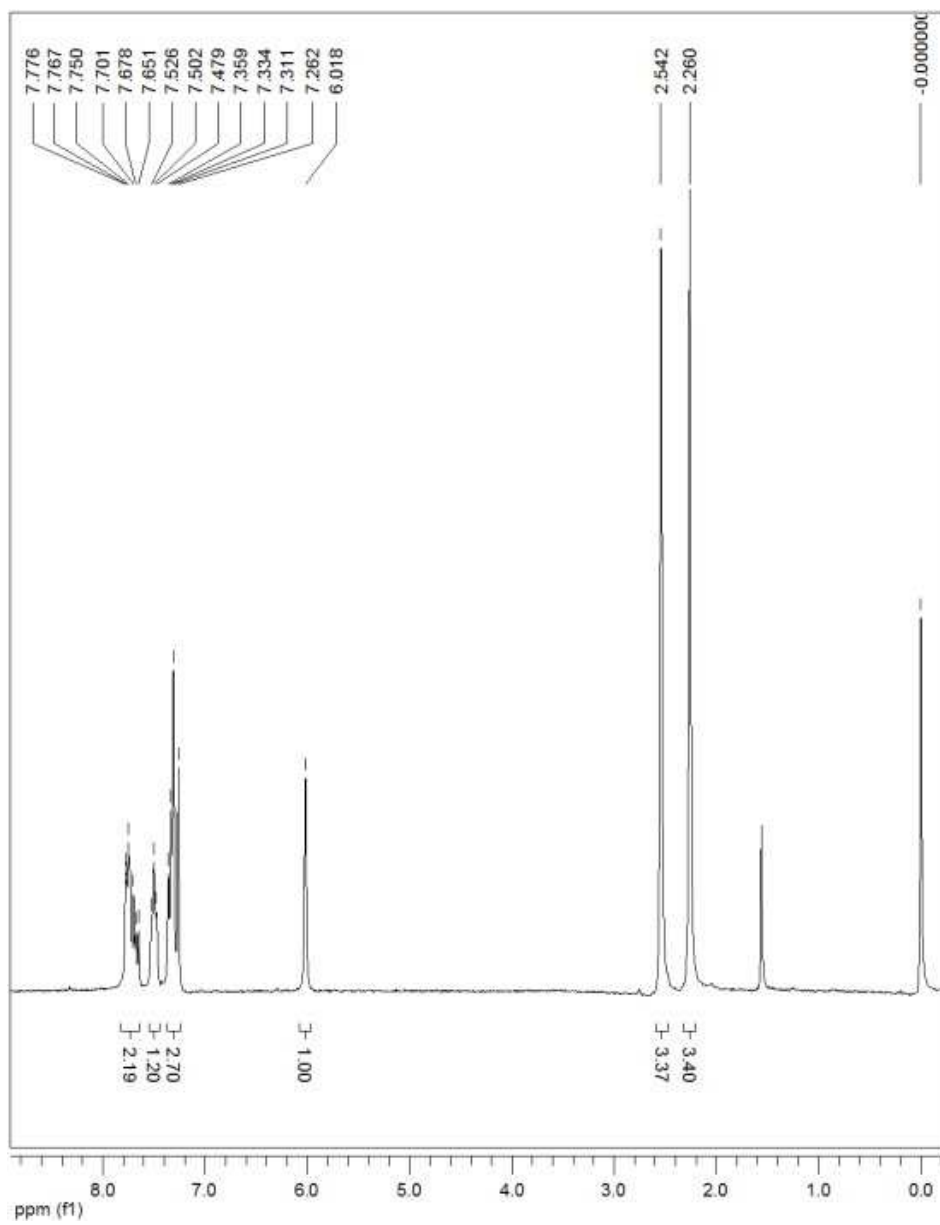



$^{13}\text{C}$  NMR of compound **4d** in  $\text{CDCl}_3$

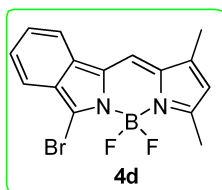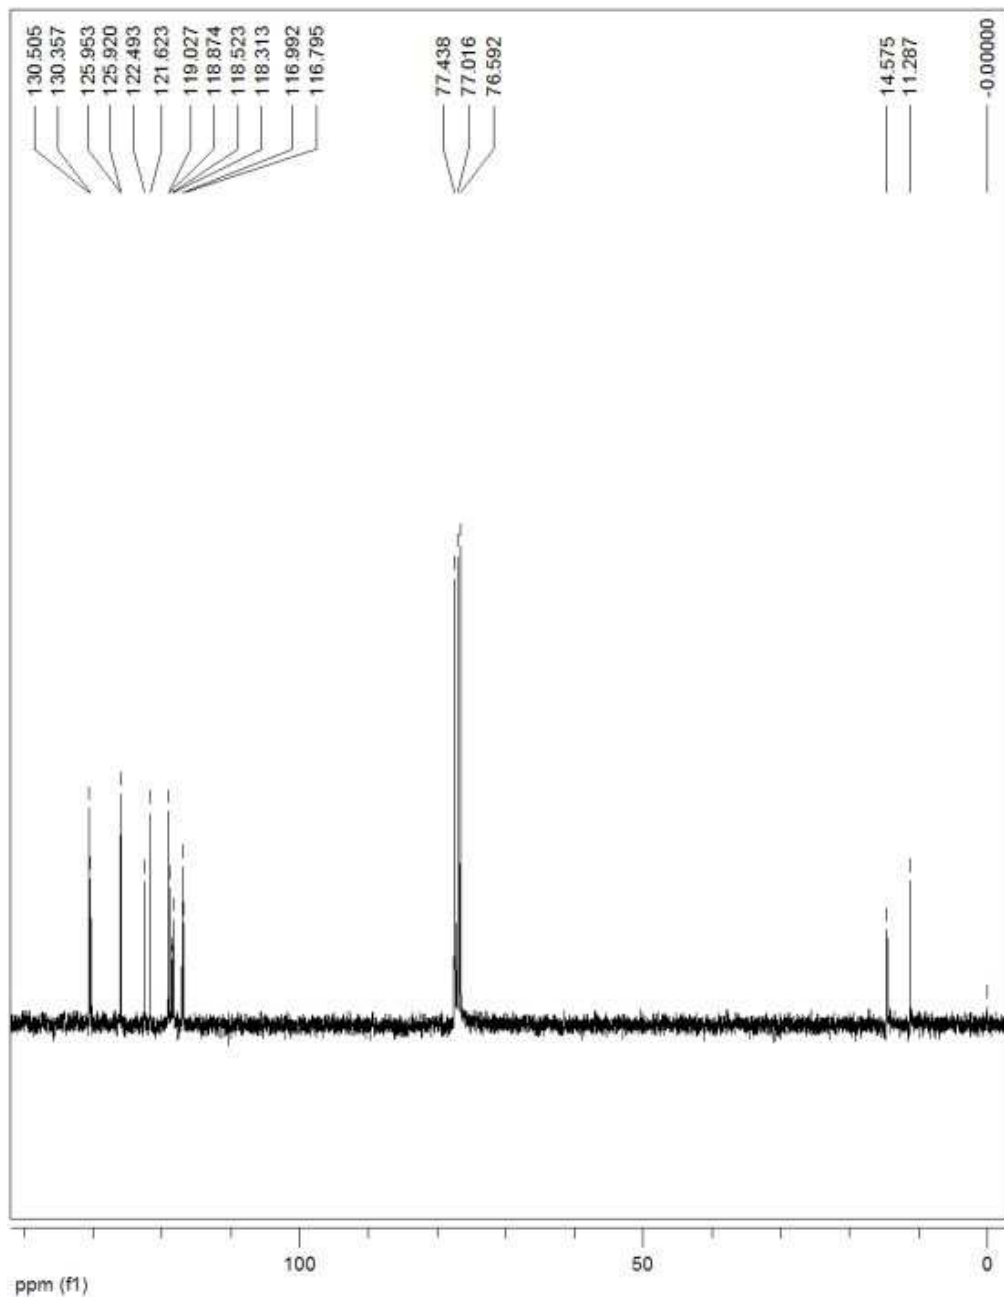



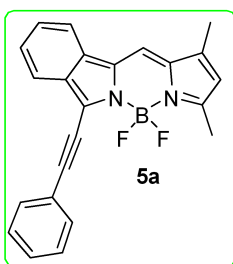

$^1\text{H}$  NMR compound **5a** in  $\text{CDCl}_3$

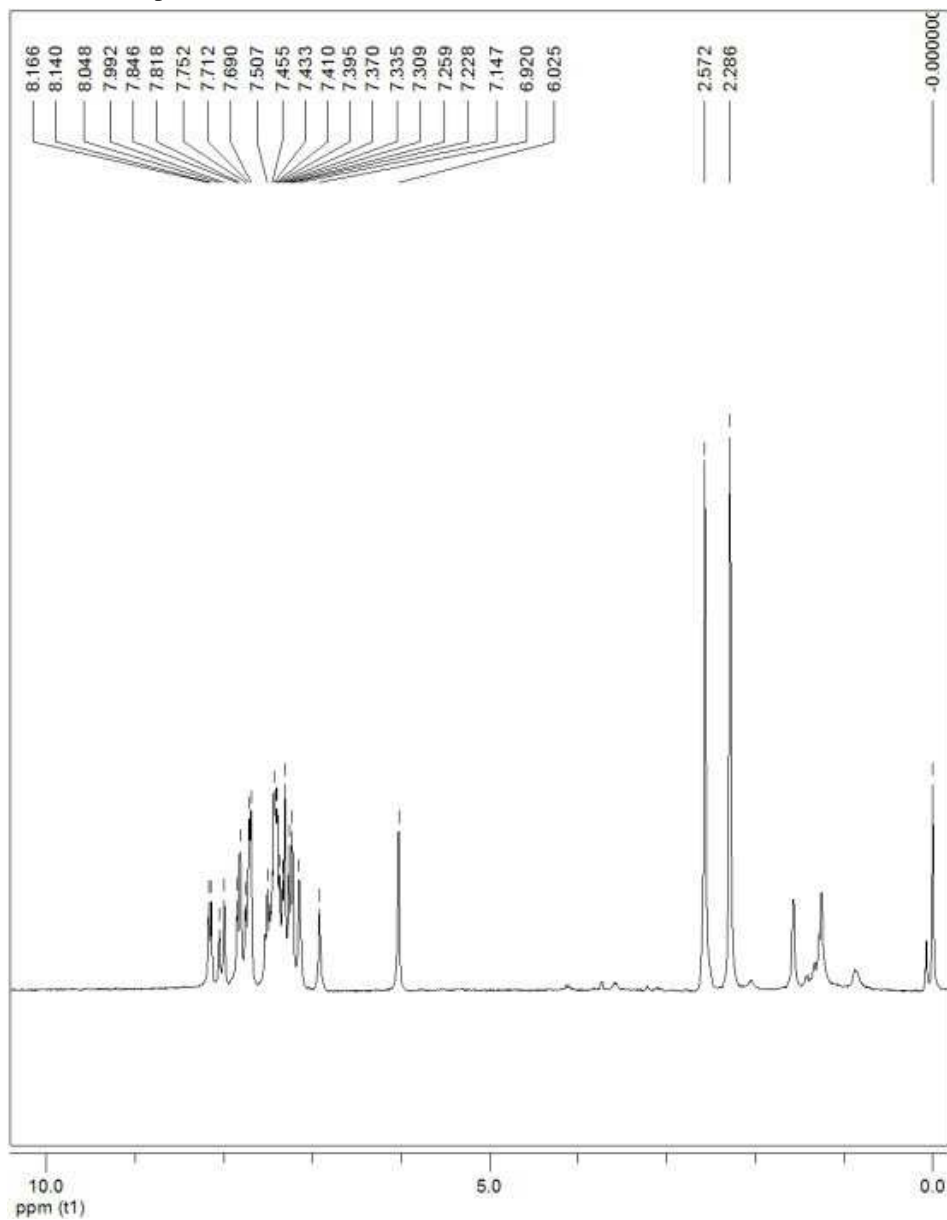



$^{13}\text{C}$  NMR of compound **5a** in  $\text{CDCl}_3$

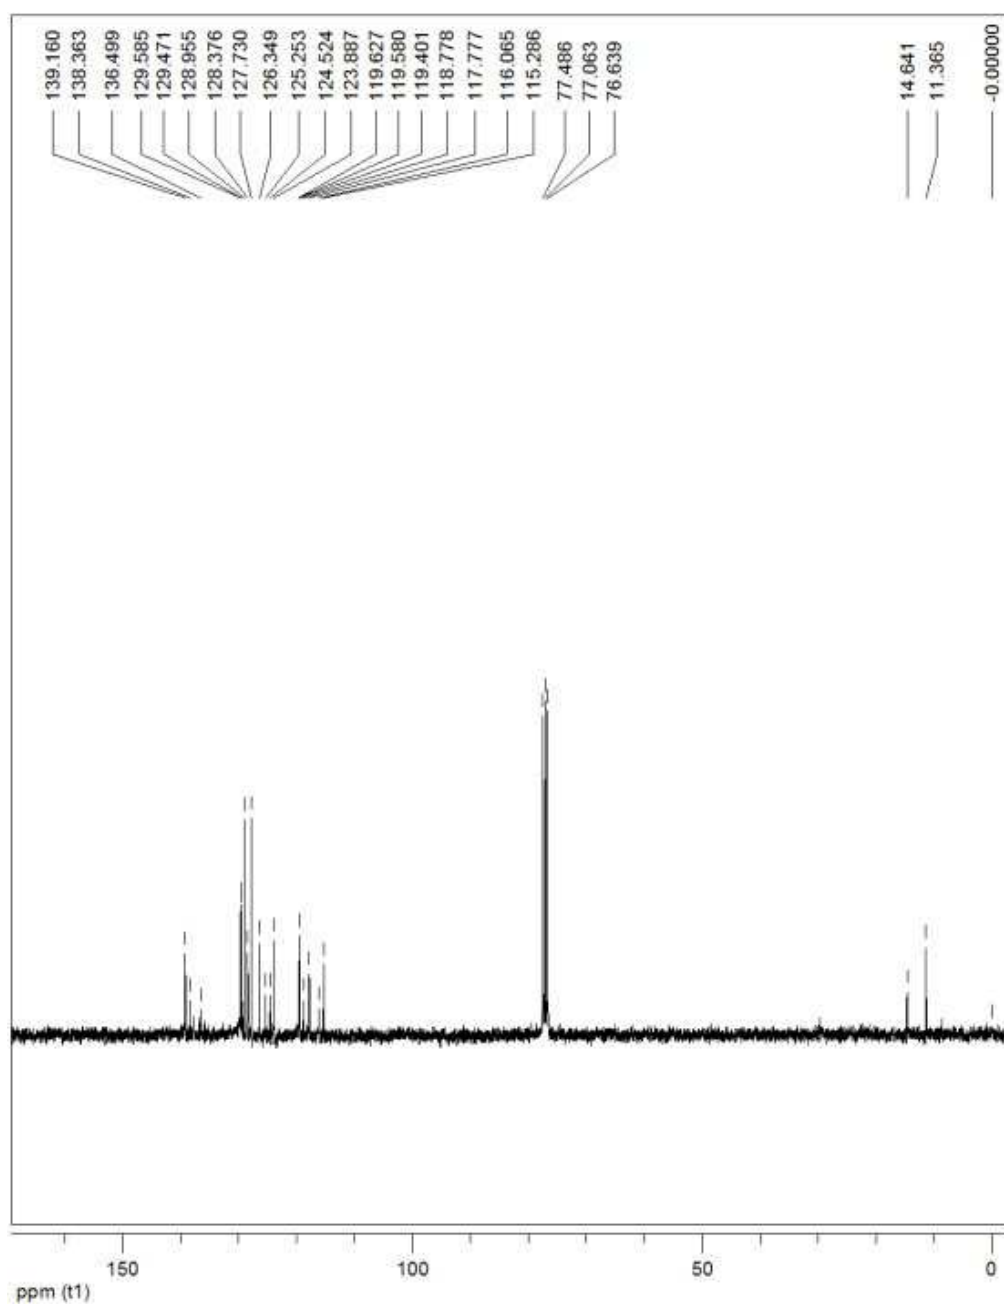



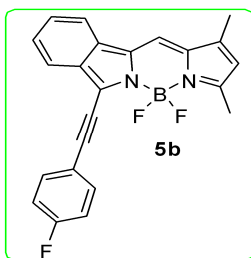

$^1\text{H}$  NMR compound **5b** in  $\text{CDCl}_3$

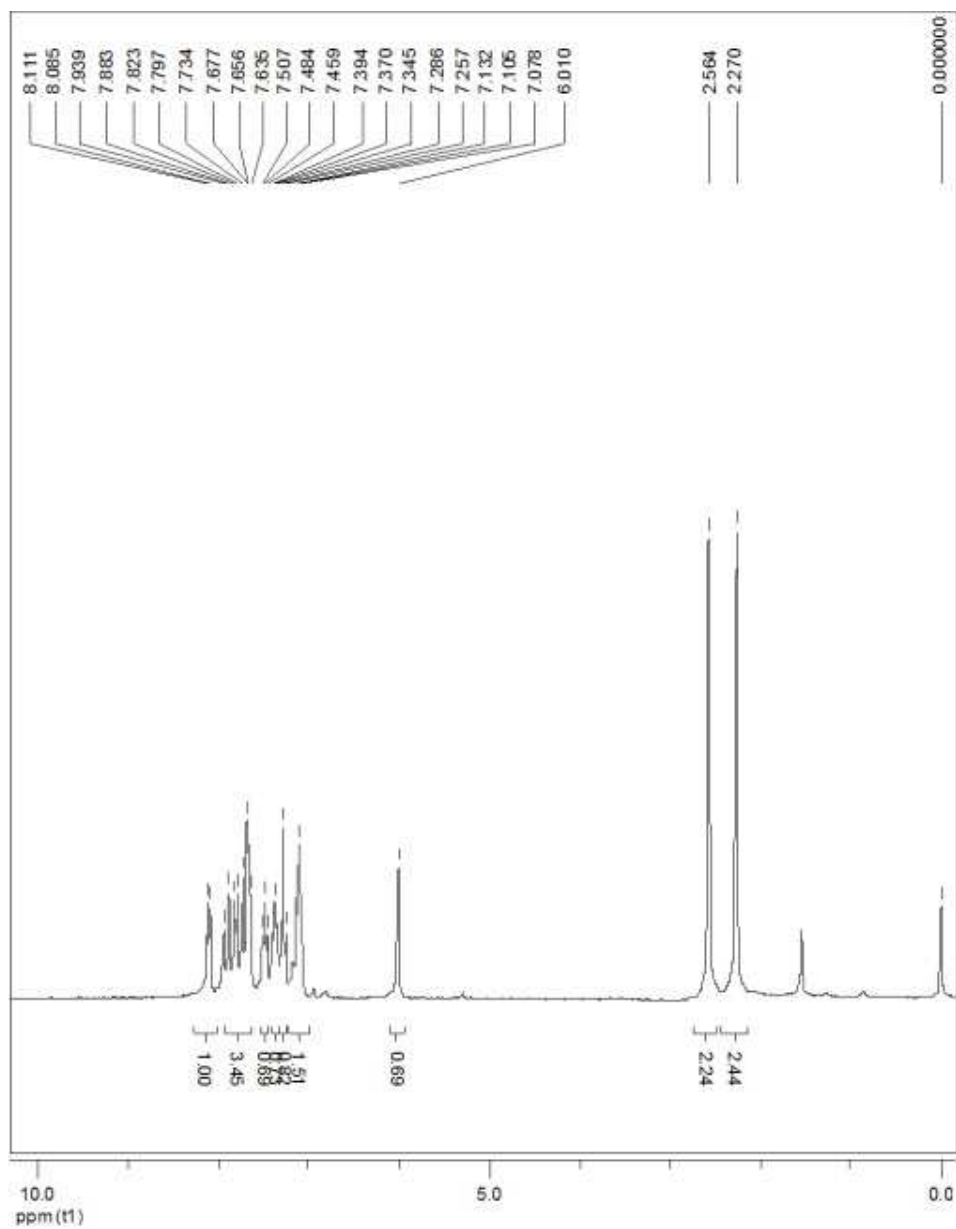



$^{13}\text{C}$  NMR of compound **5b** in  $\text{CDCl}_3$

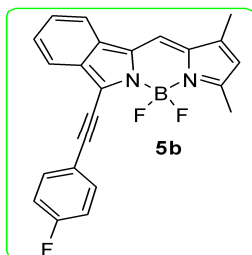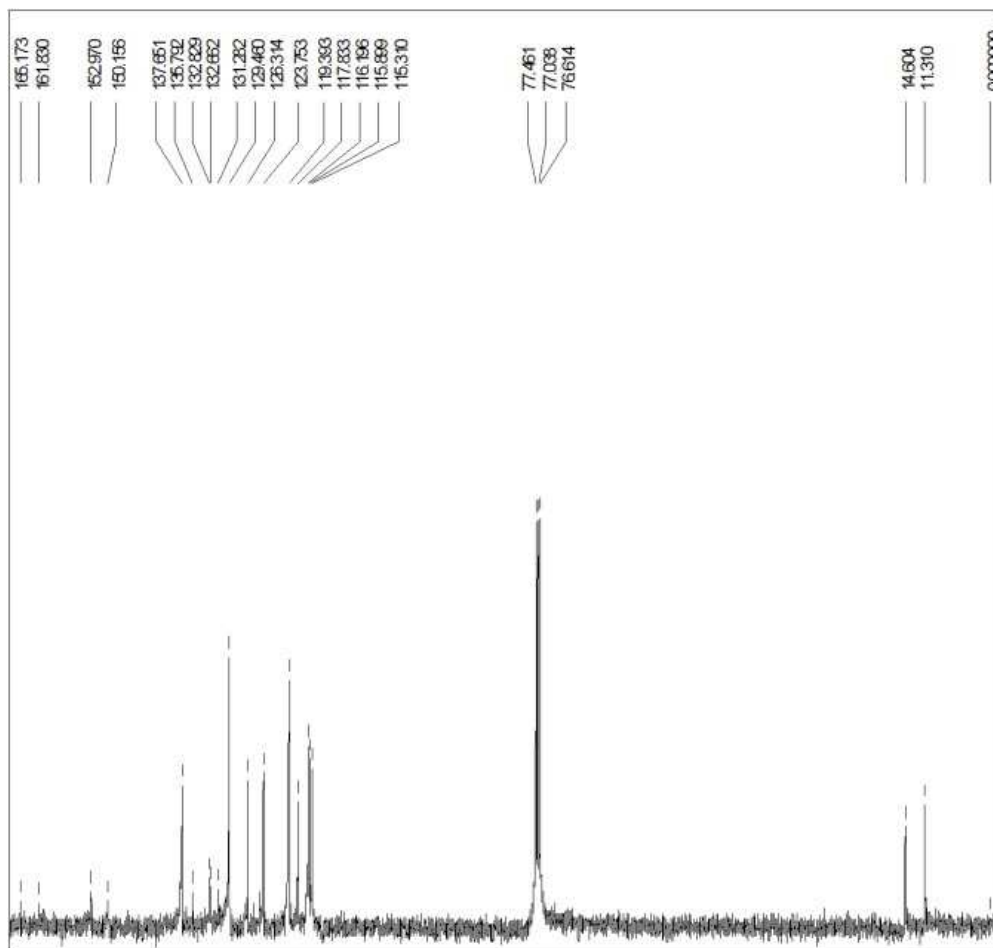



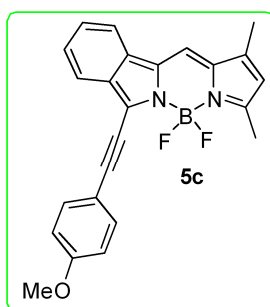

$^1\text{H}$  NMR compound **5c** in  $\text{CDCl}_3$

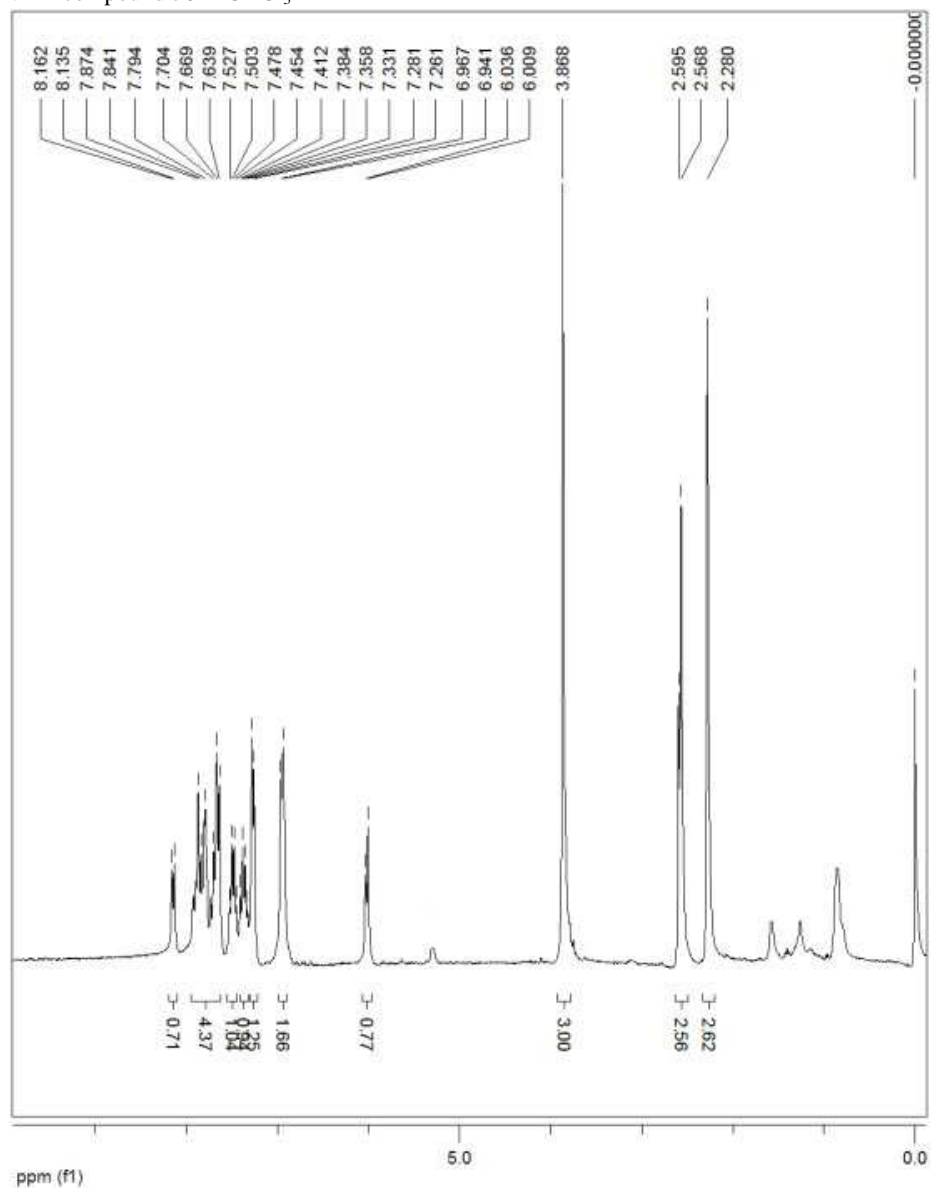



$^{13}\text{C}$  NMR of compound **5c** in  $\text{CDCl}_3$

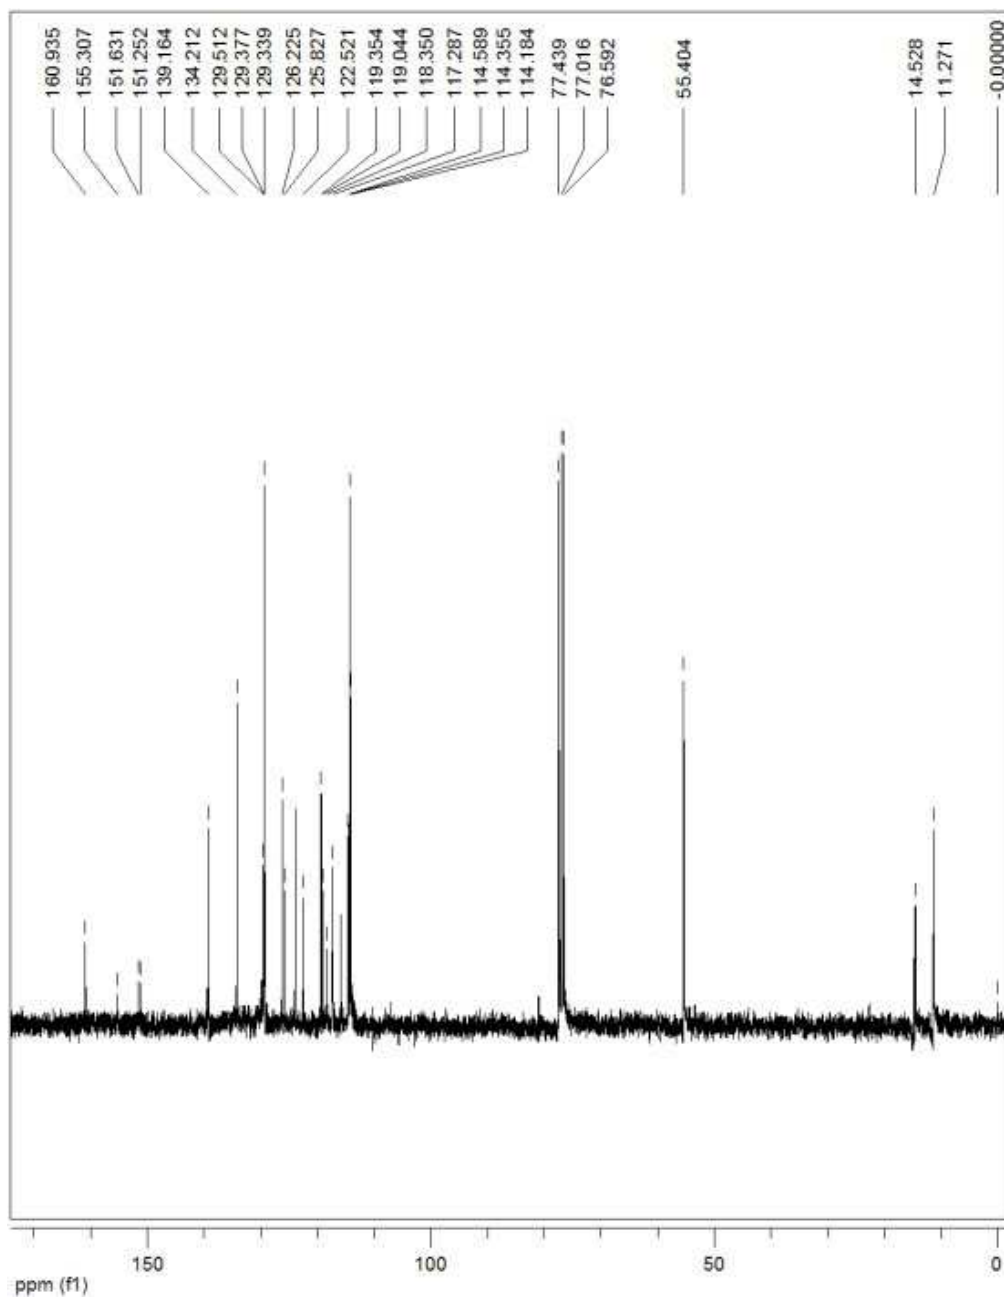



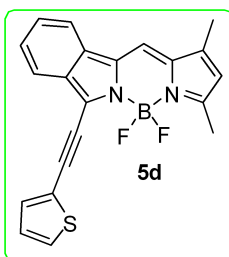

$^1\text{H}$  NMR compound **5d** in  $\text{CDCl}_3$

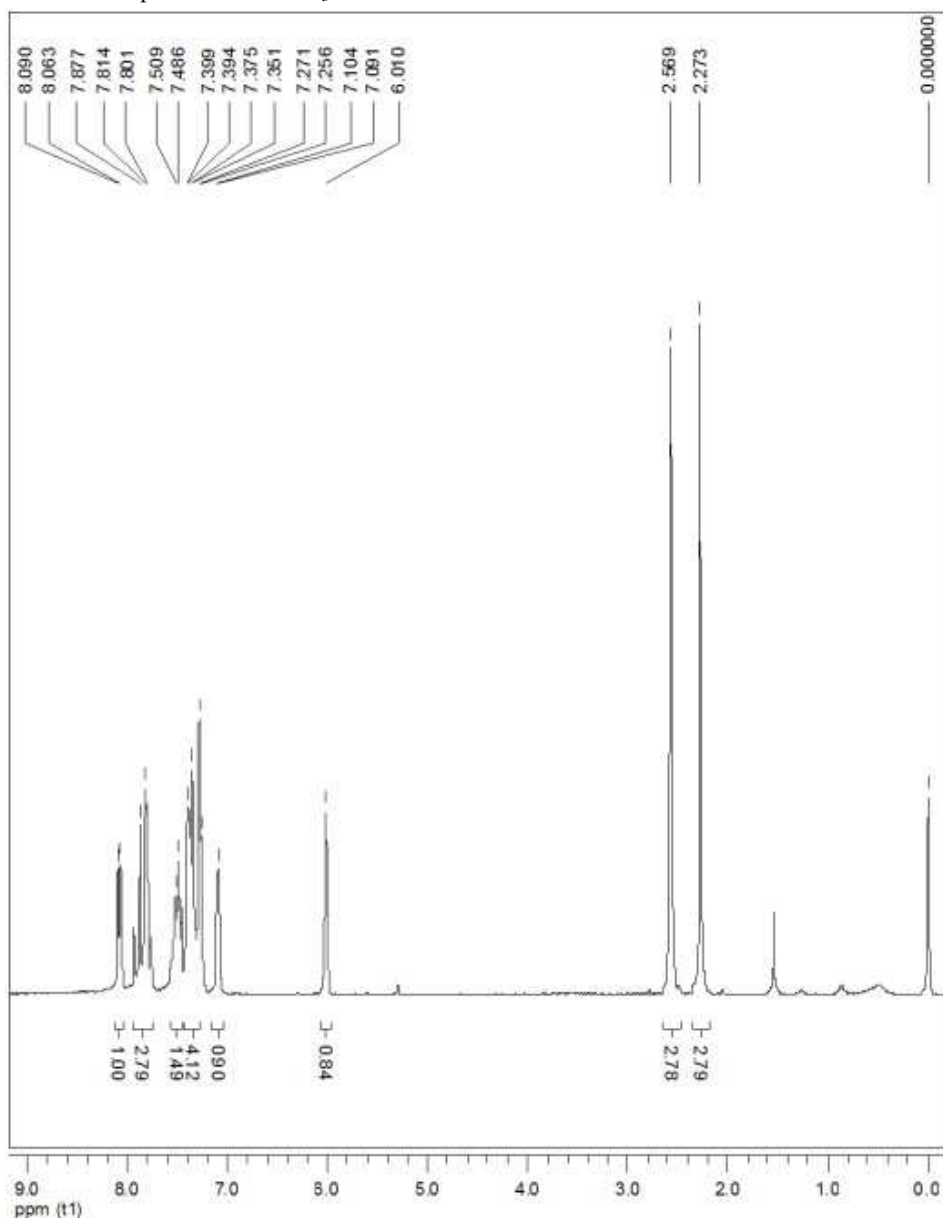



$^{13}\text{C}$  NMR of compound **5d** in  $\text{CDCl}_3$

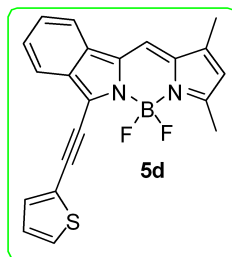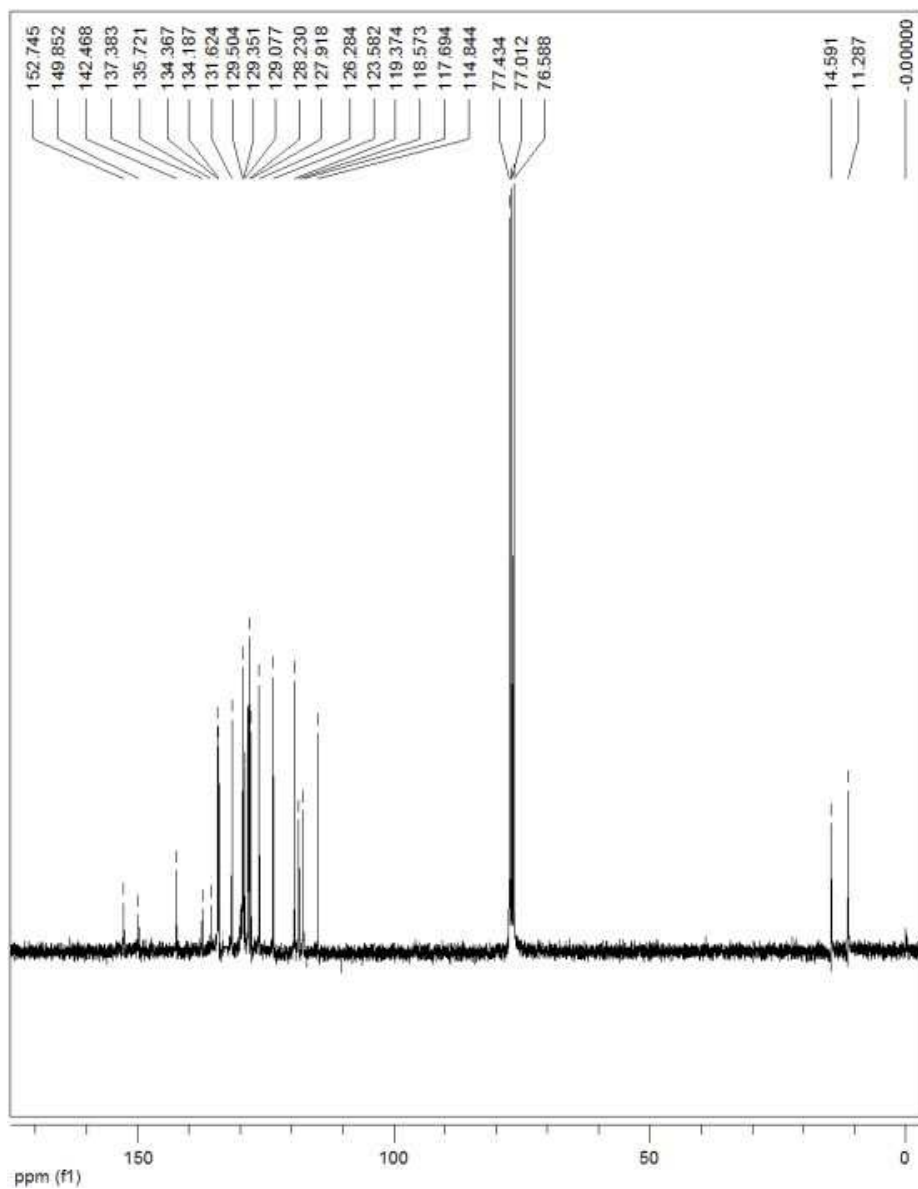



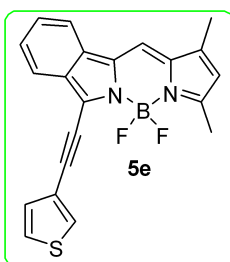

$^1\text{H}$  NMR compound **5e** in  $\text{CDCl}_3$

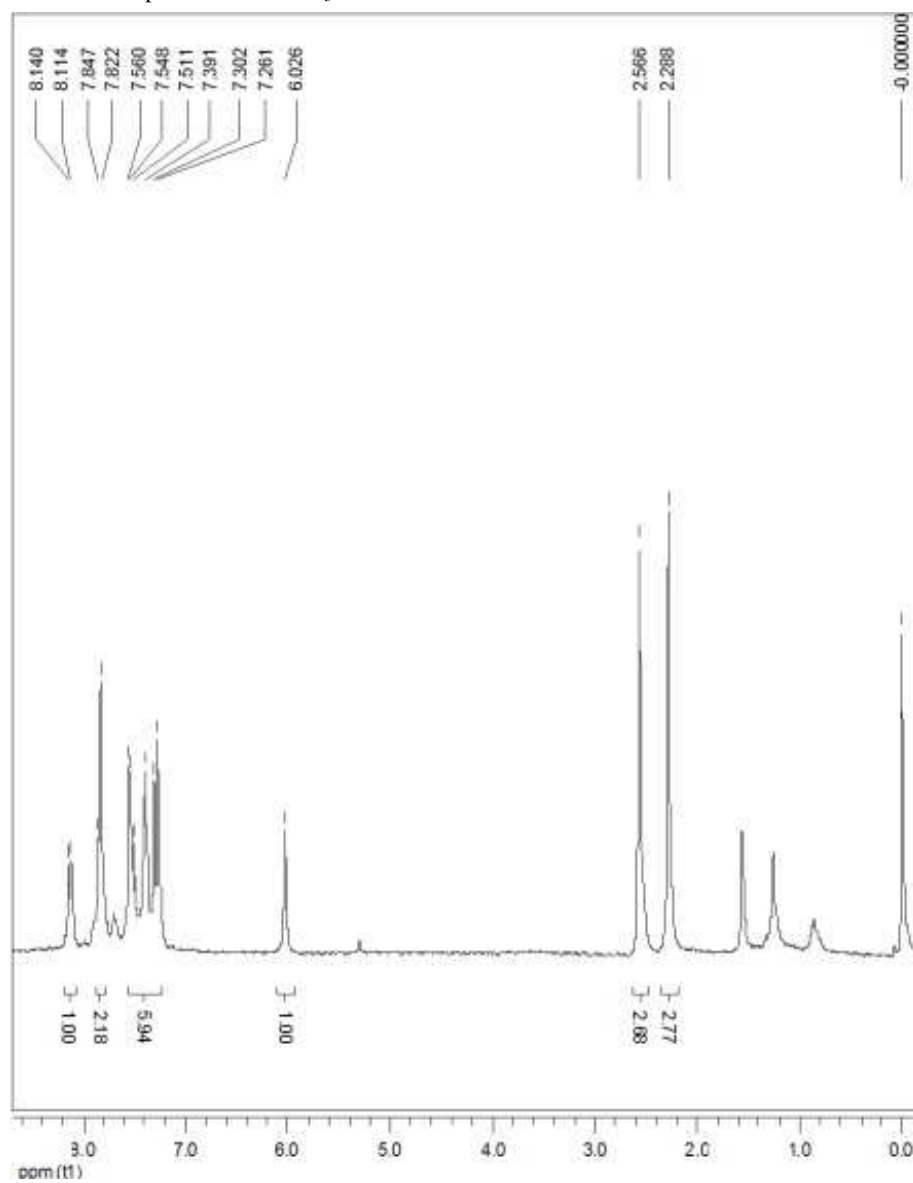



$^{13}\text{C}$  NMR of compound **5e** in  $\text{CDCl}_3$

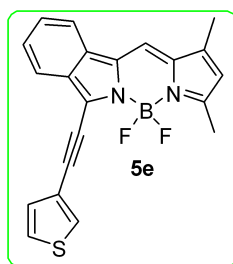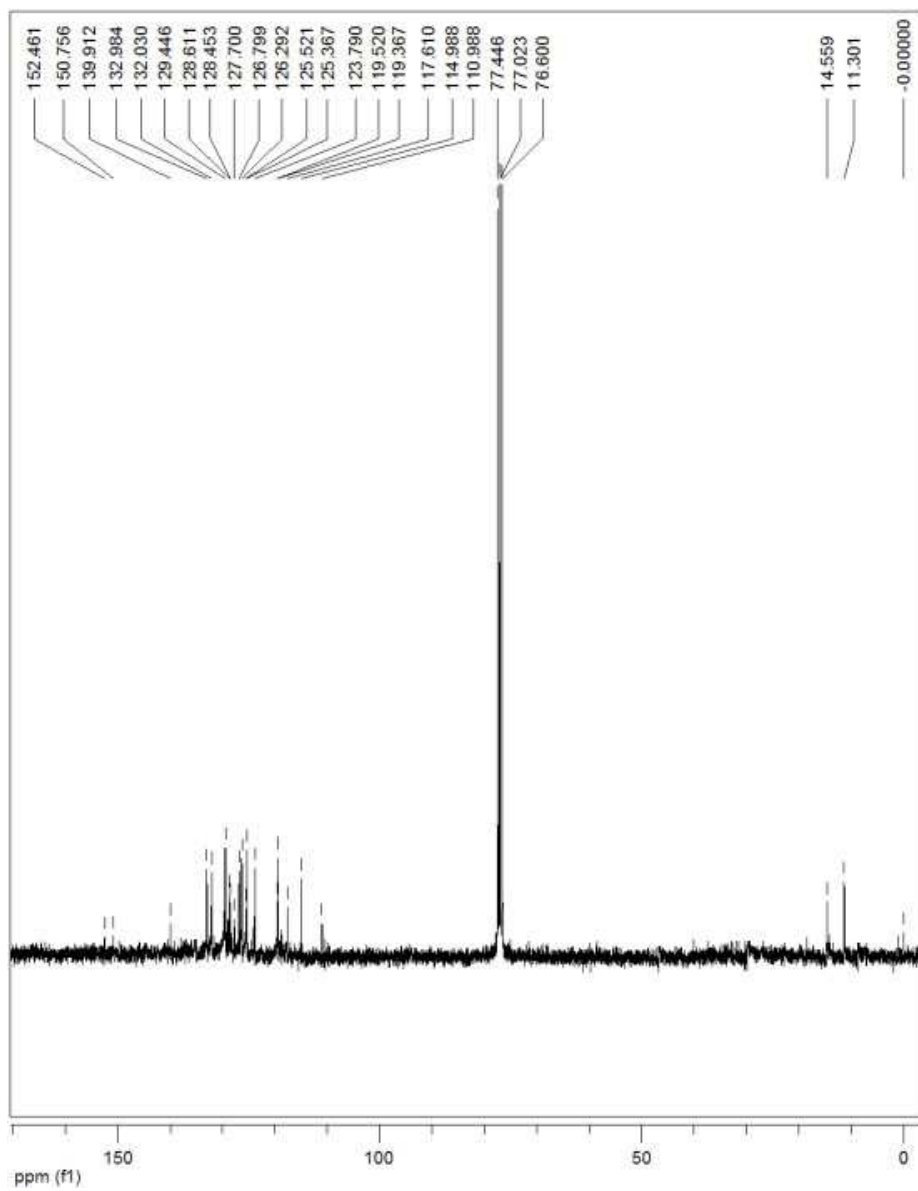



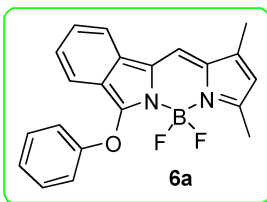

<sup>1</sup>H NMR of compound **6a** in CDCl<sub>3</sub>

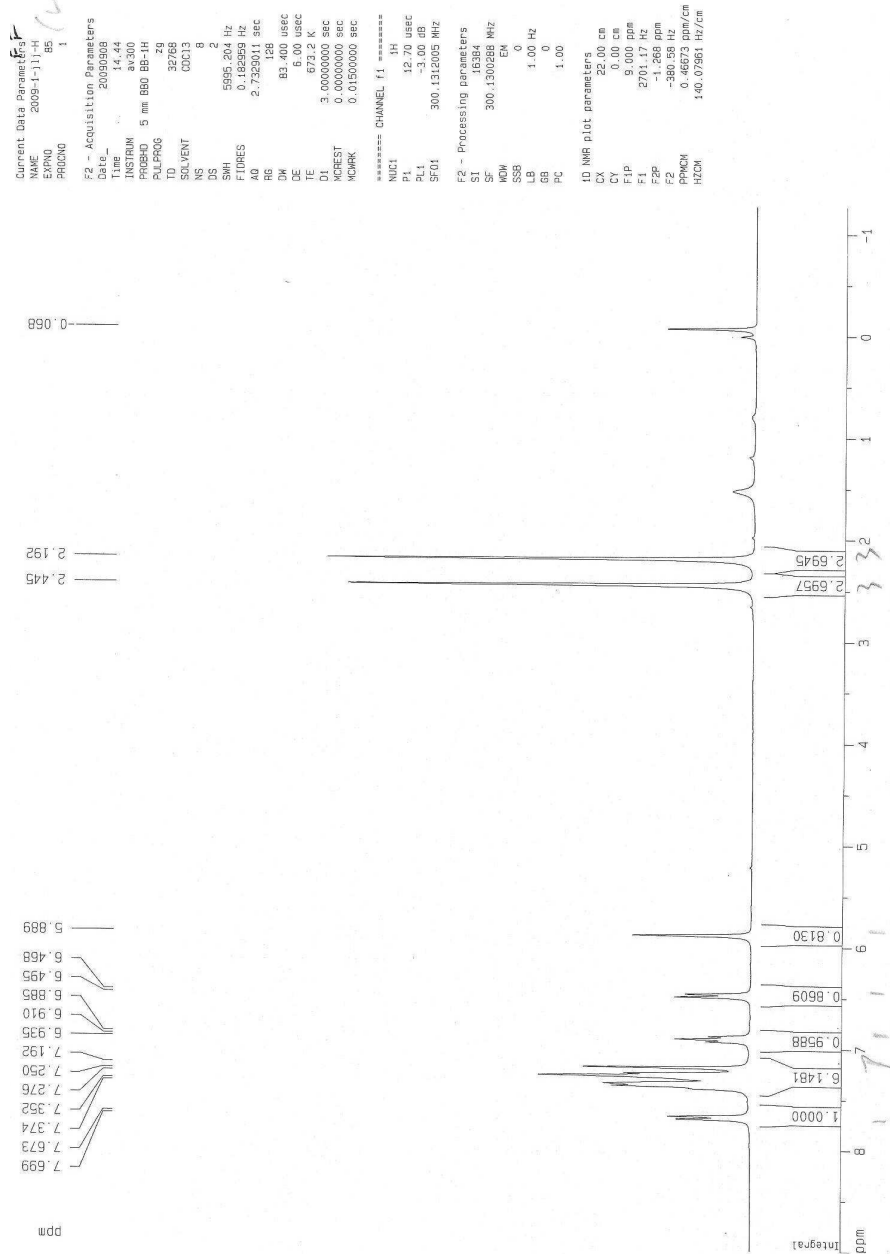



<sup>13</sup>C NMR of compound **6a** in CDCl<sub>3</sub>

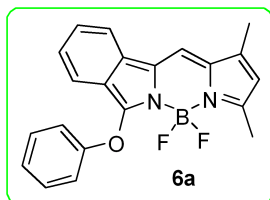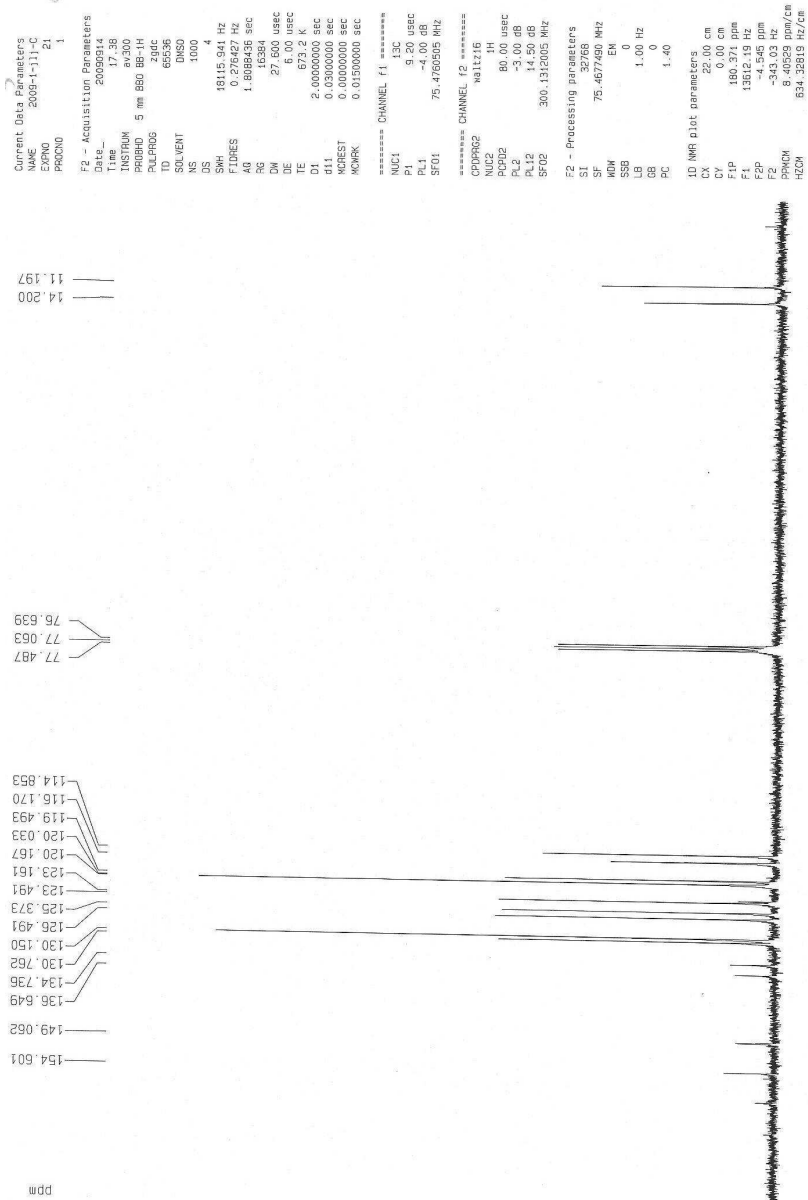



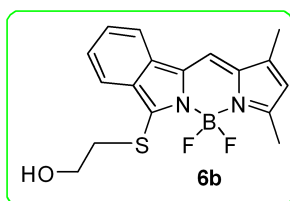

$^1\text{H}$  NMR of compound **6b** in  $\text{CDCl}_3$

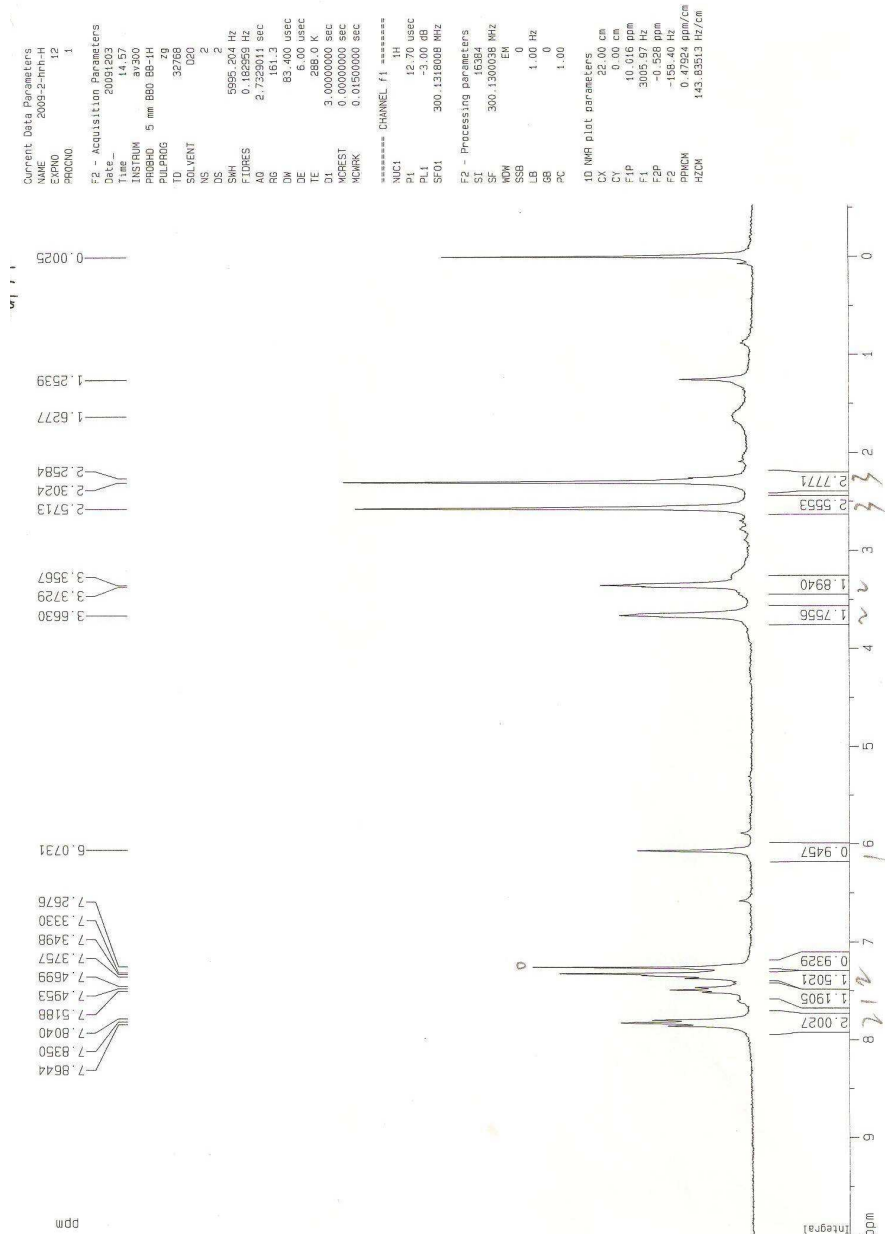



$^{13}\text{C}$  NMR of compound **6b** in  $\text{CDCl}_3$

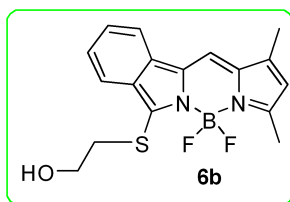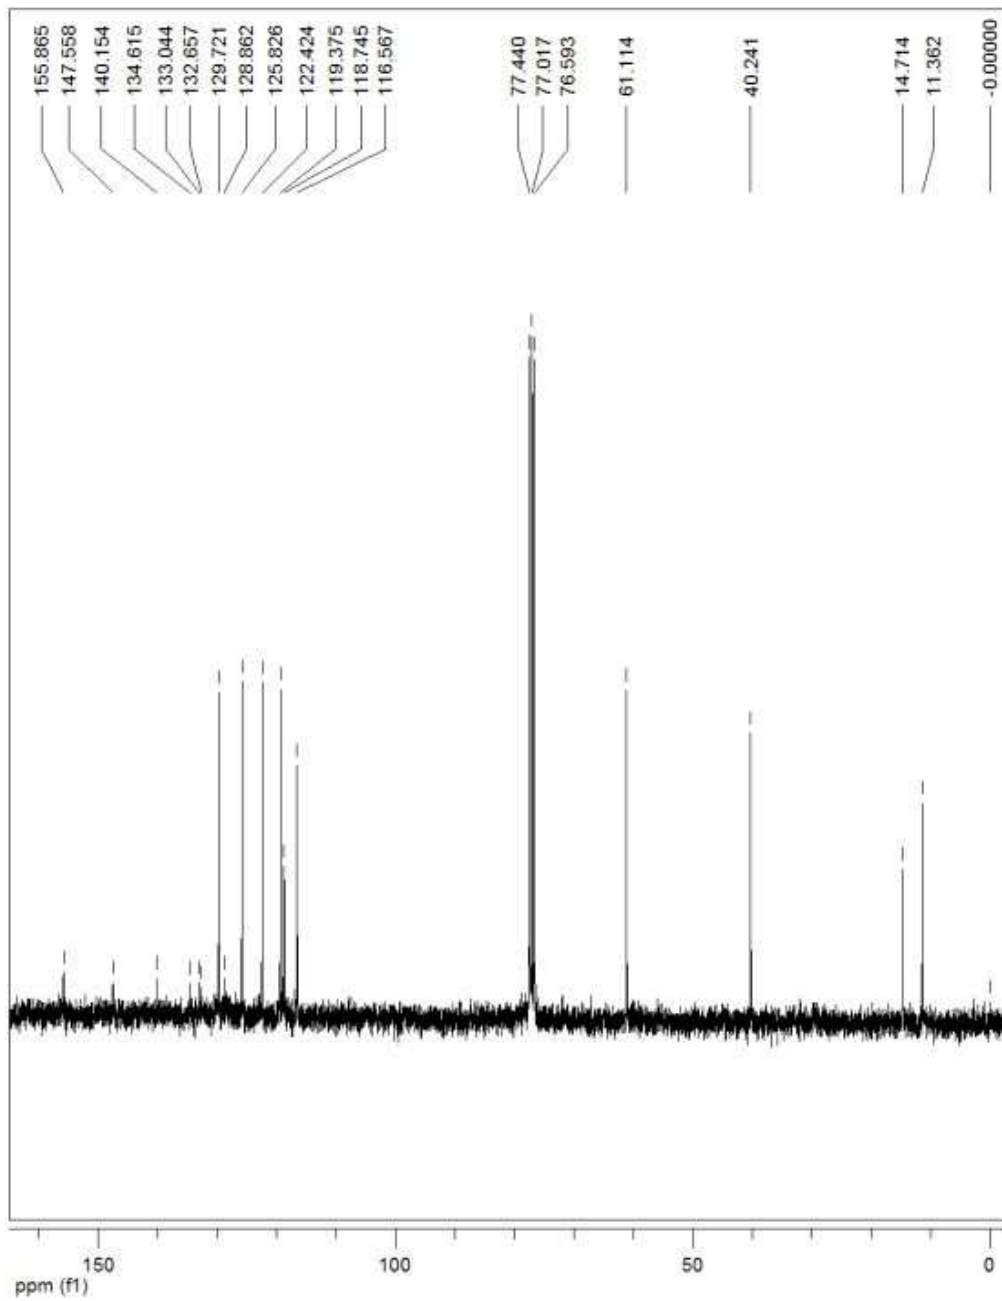



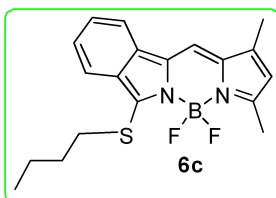

$^1\text{H}$  NMR of compound **6c** in  $\text{CDCl}_3$

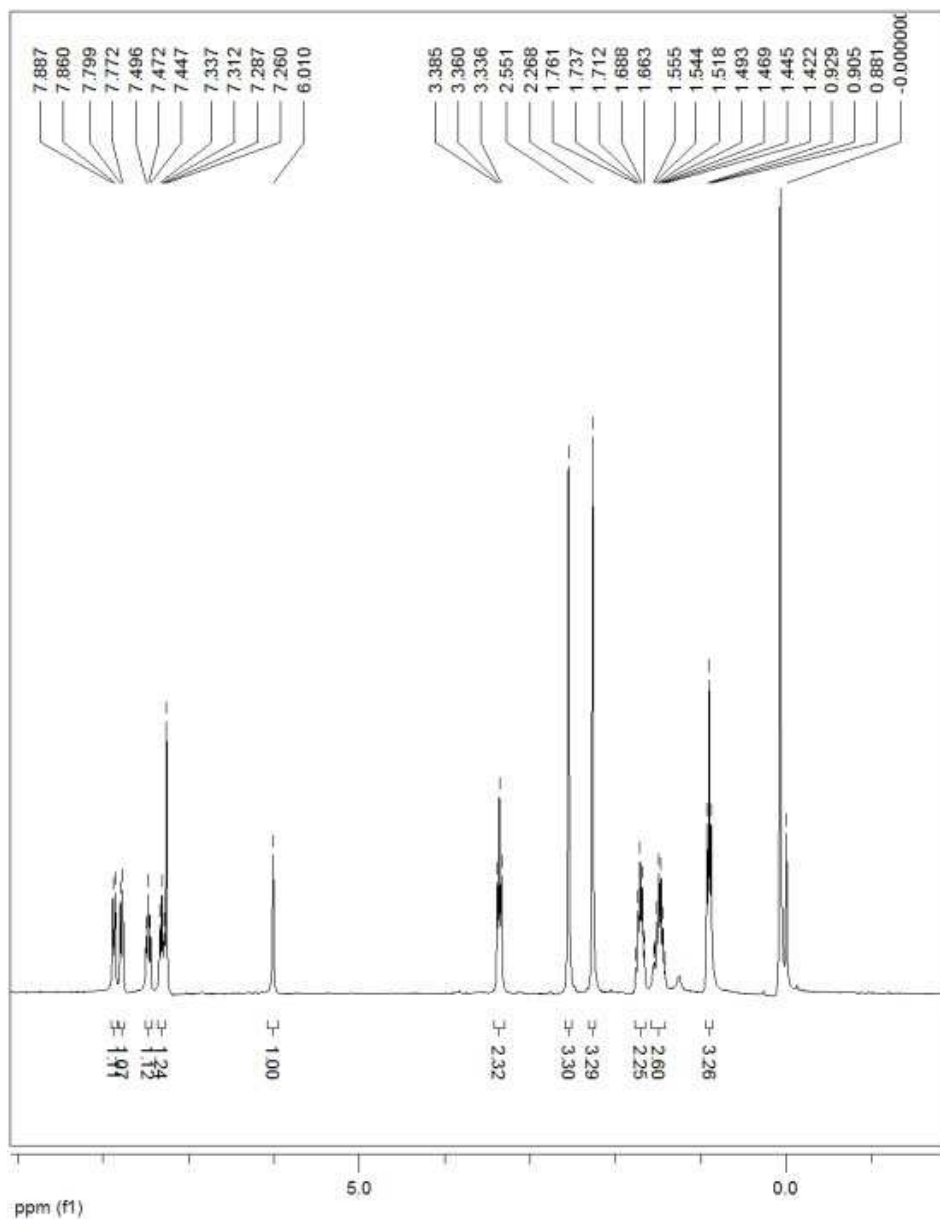



$^{13}\text{C}$  NMR of compound **6c** in  $\text{CDCl}_3$

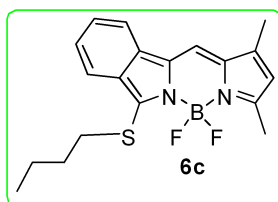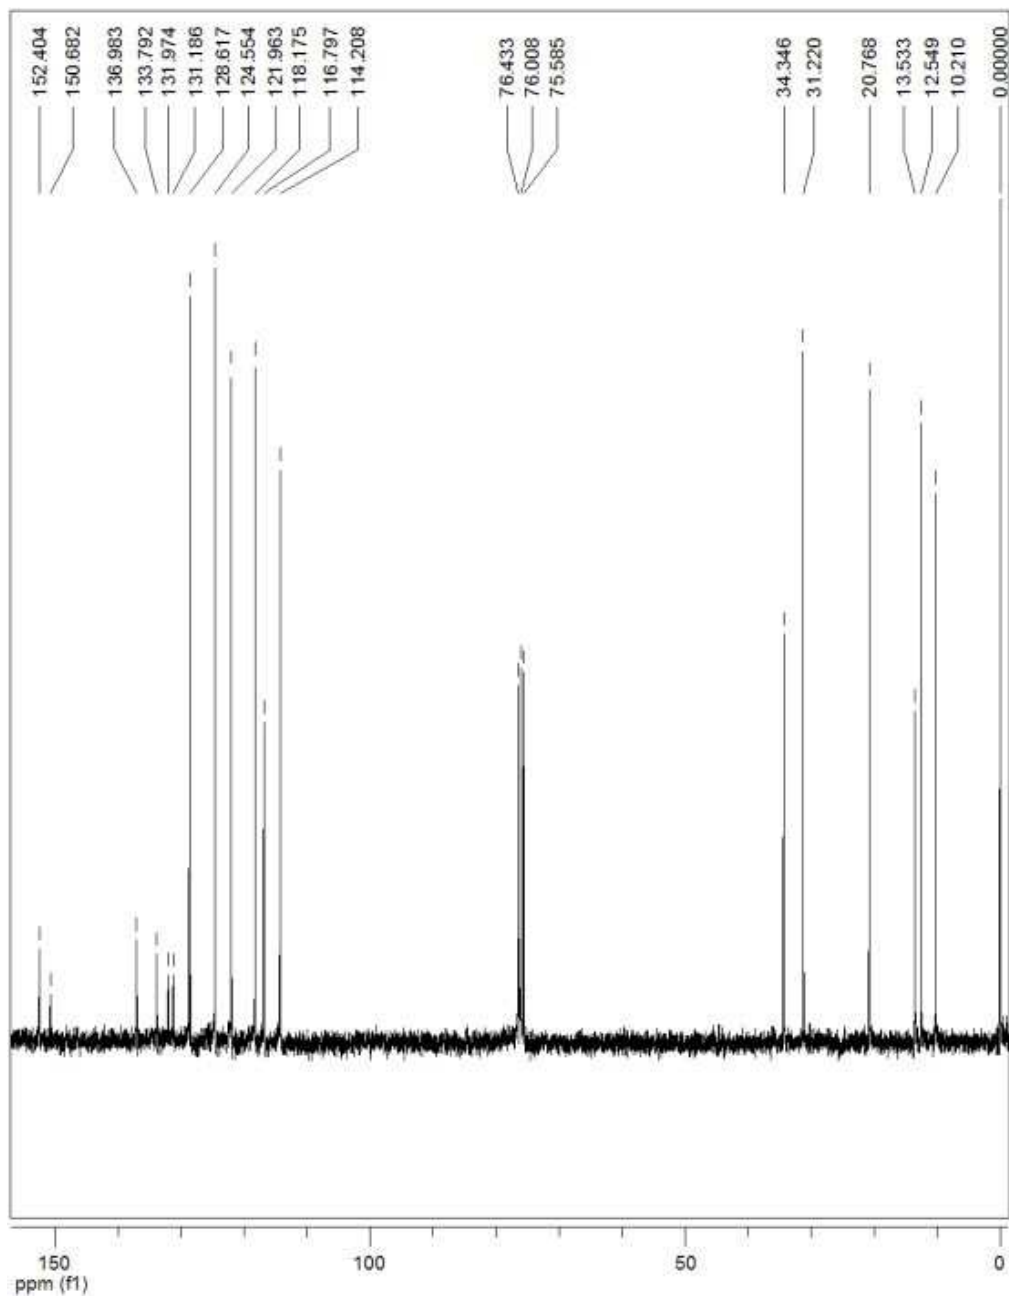



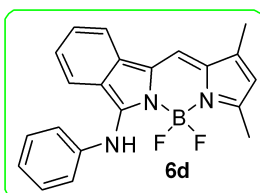

$^1\text{H}$  NMR of compound **6d** in  $\text{CDCl}_3$

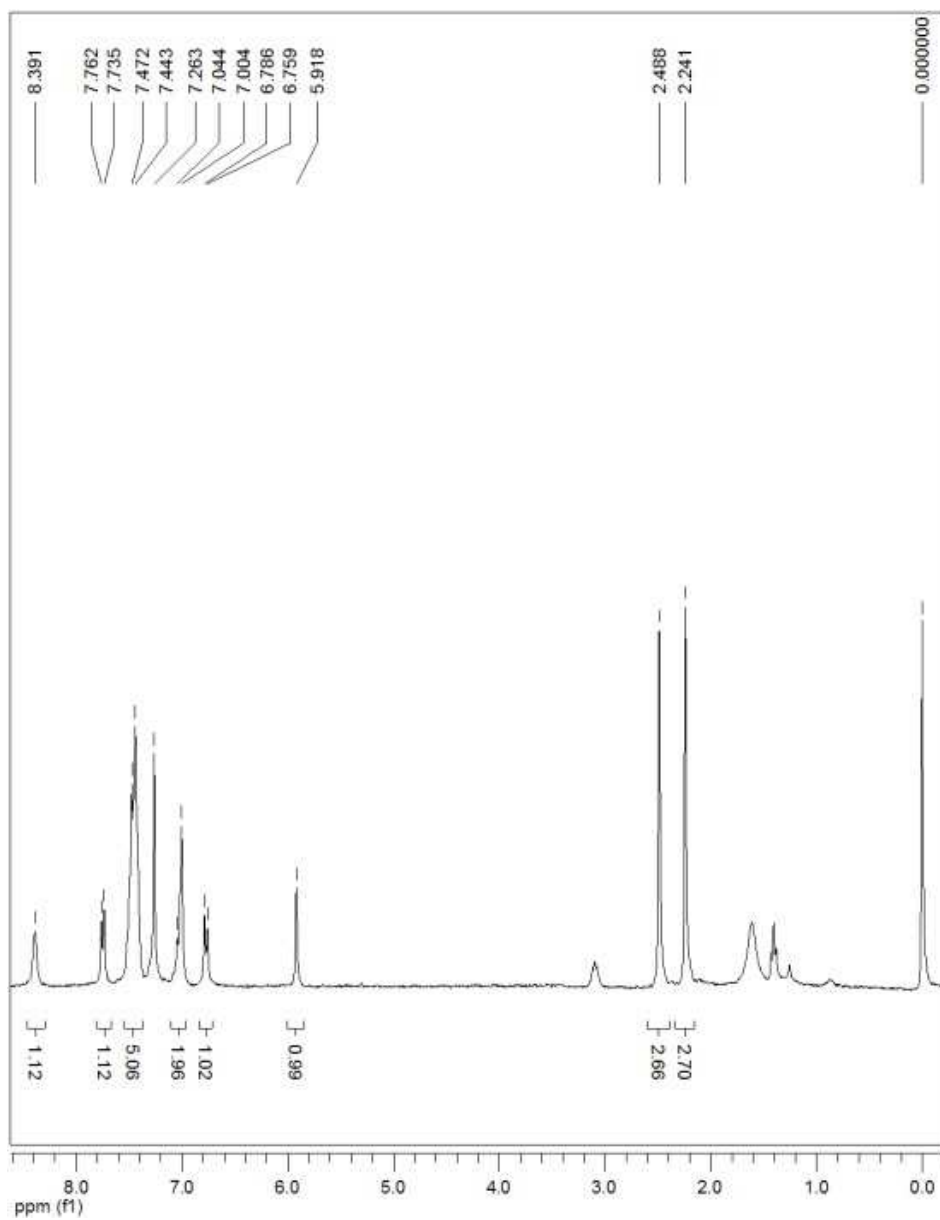



<sup>13</sup>C NMR of compound **6d** in CDCl<sub>3</sub>

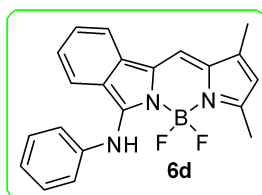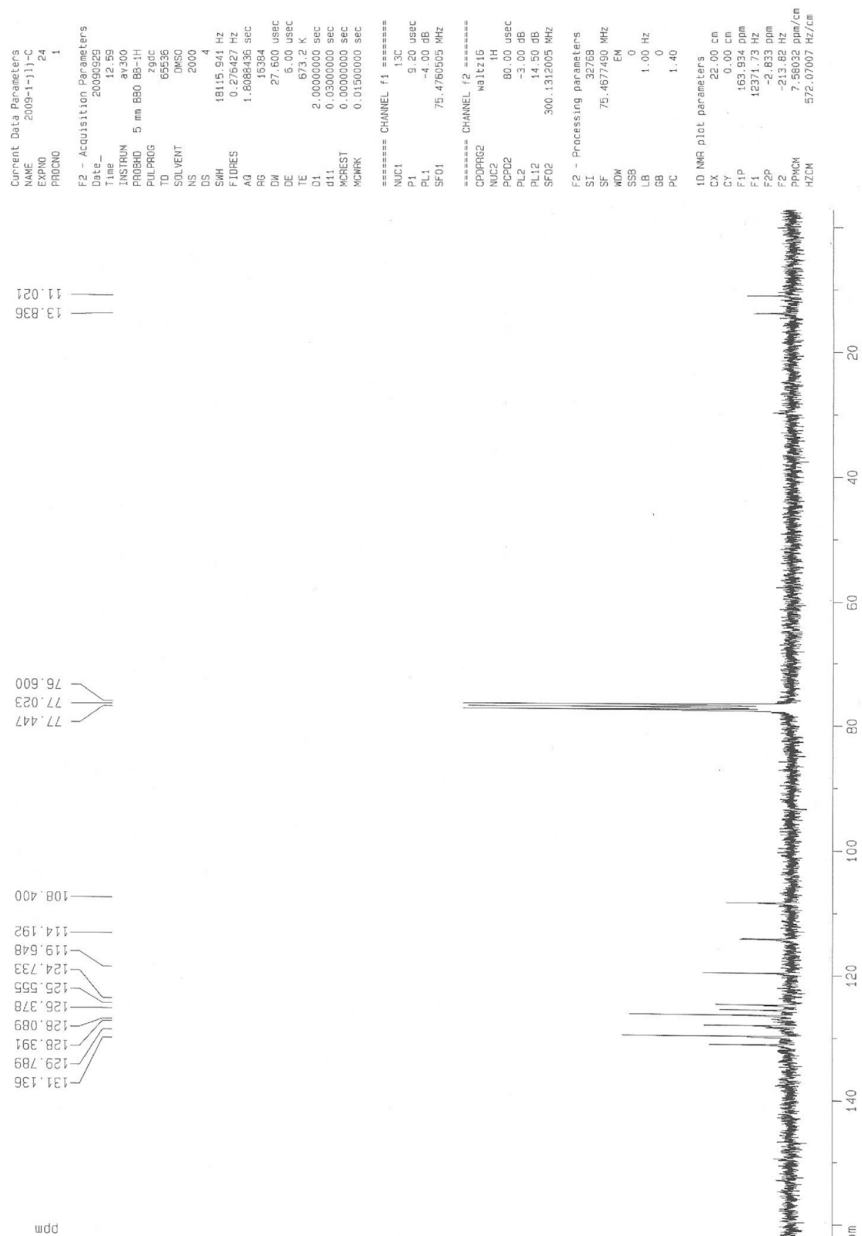



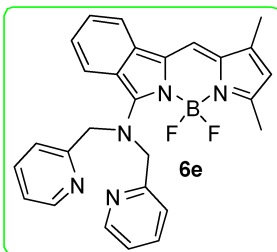

$^1\text{H}$  NMR of compound **6e** in  $\text{CDCl}_3$

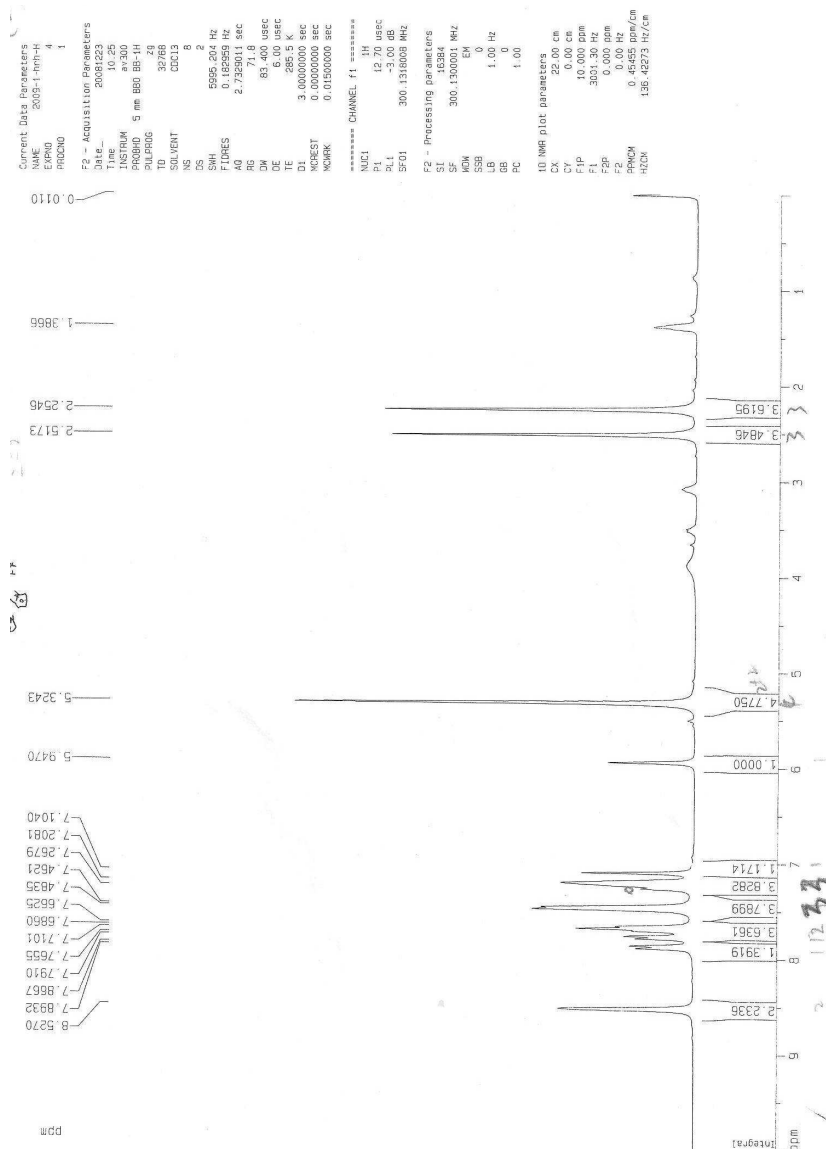



$^{13}\text{C}$  NMR of compound **6e** in  $\text{CDCl}_3$

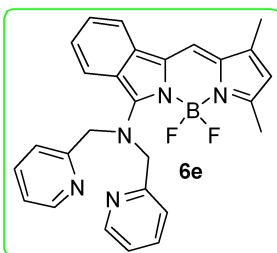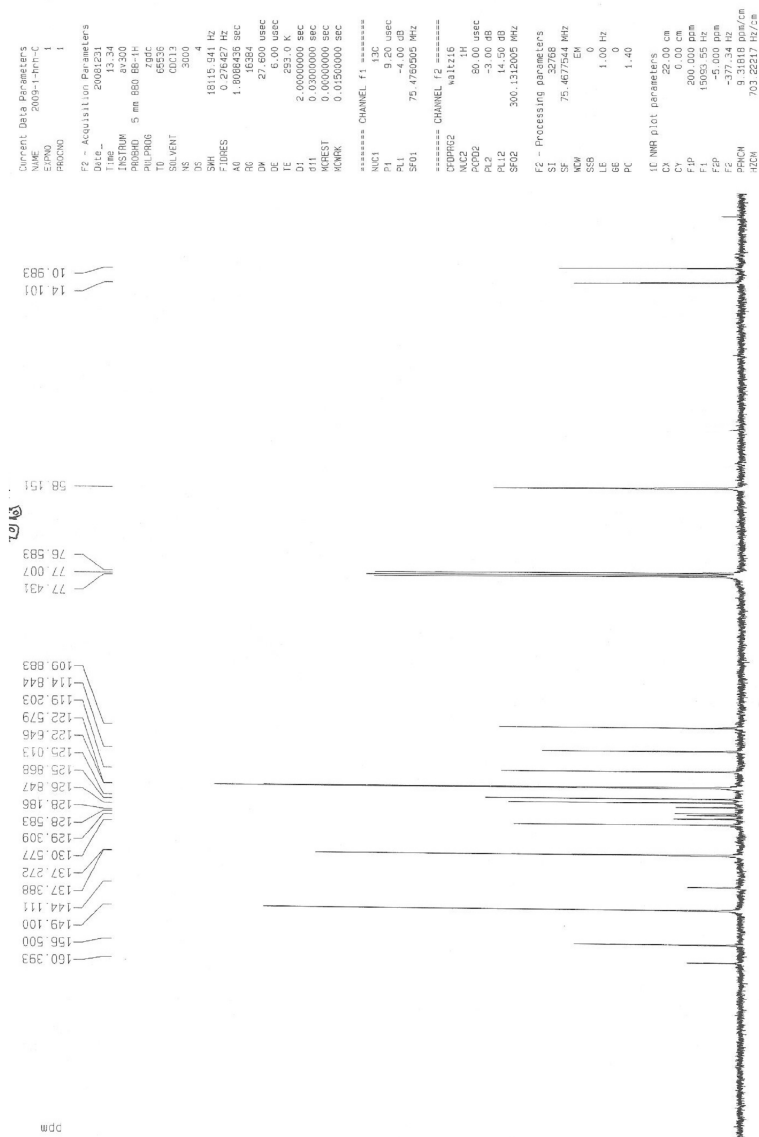



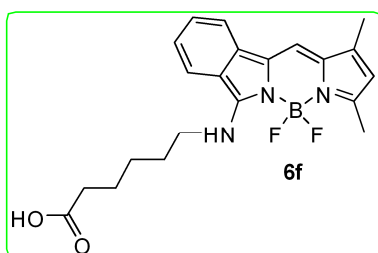

$^1\text{H}$  NMR of compound **6f** in  $\text{CDCl}_3$

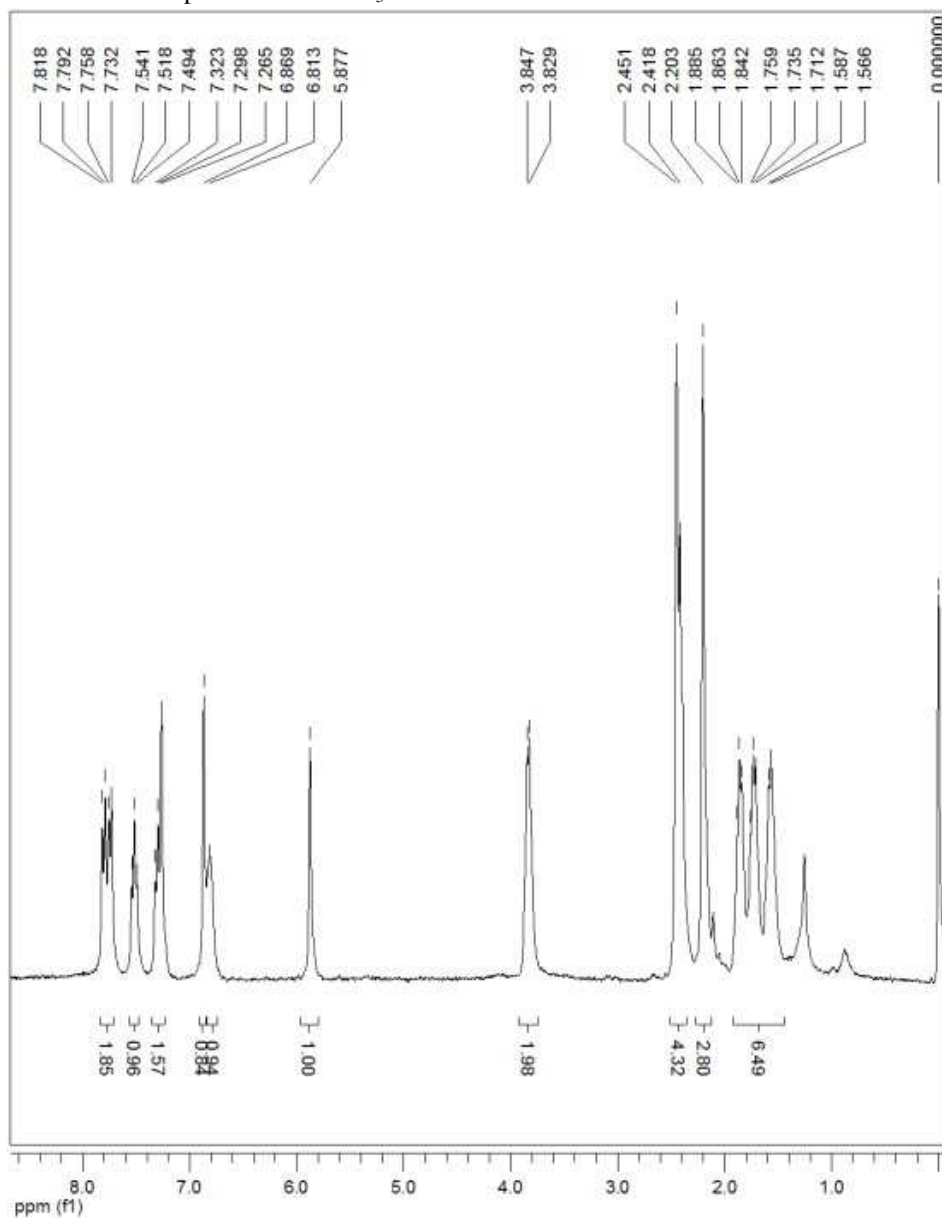



$^{13}\text{C}$  NMR of compound **6f** in  $\text{CDCl}_3$

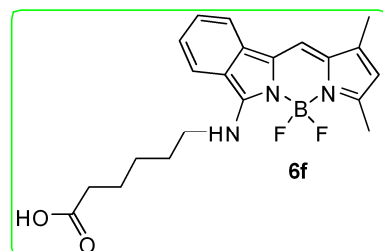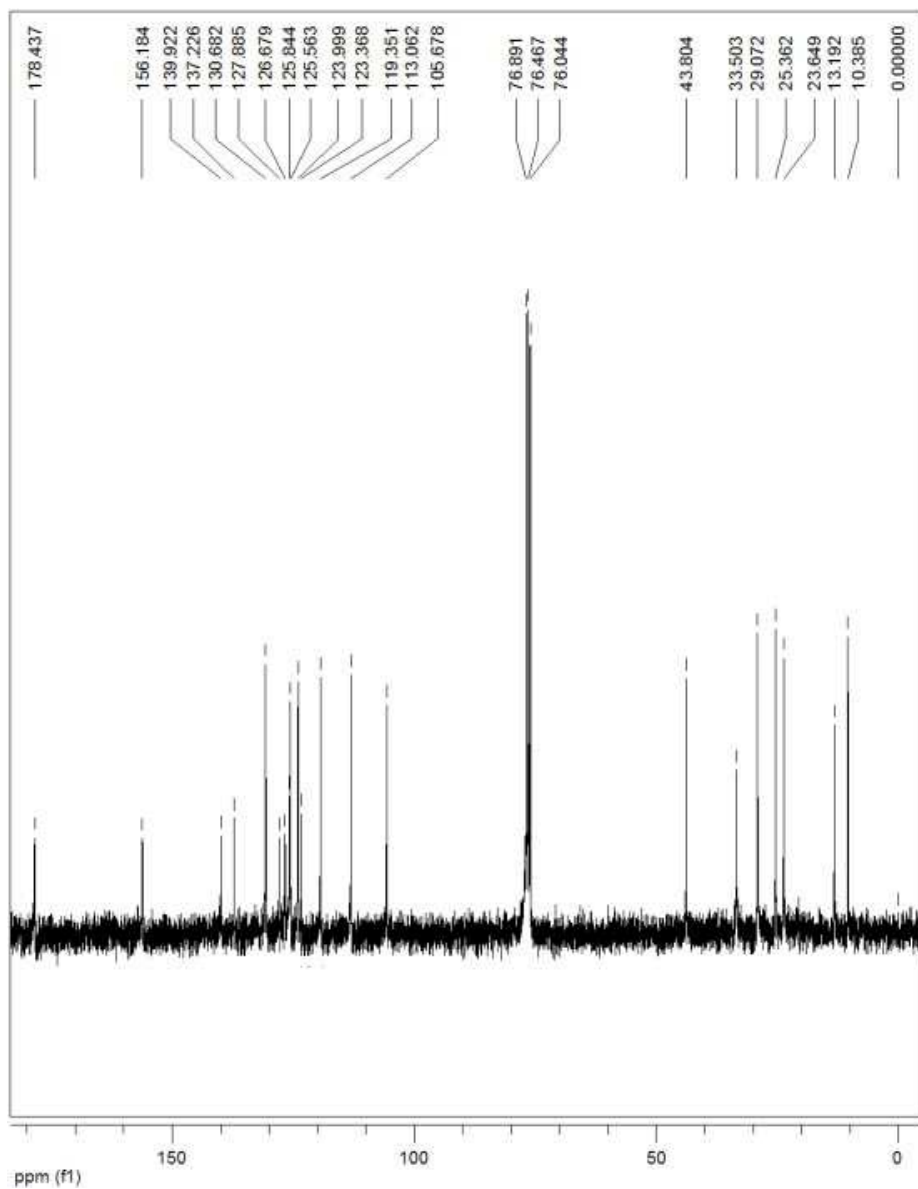



#### 4. MS for all new compounds:

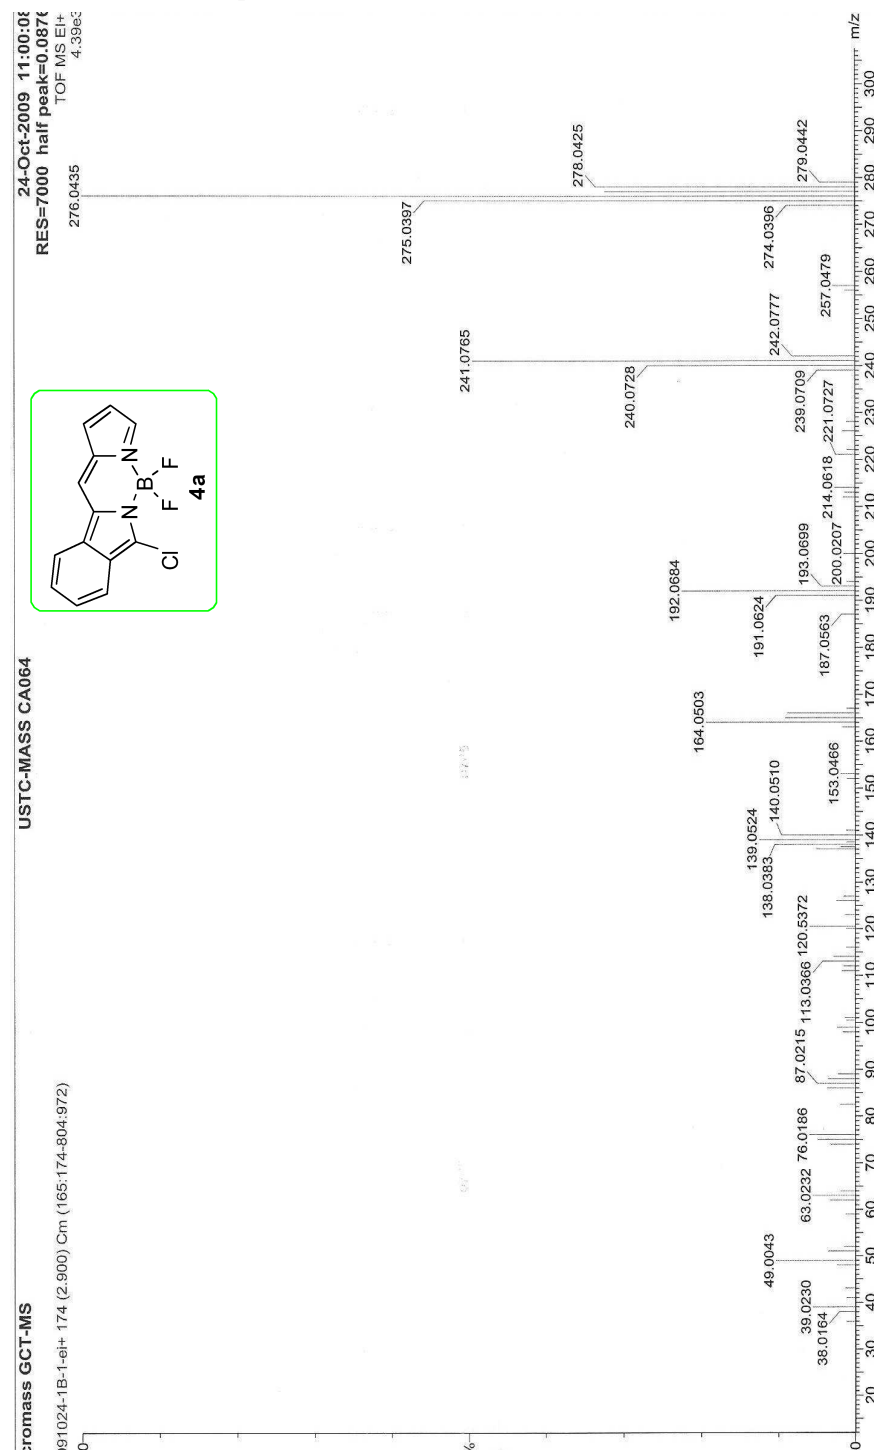



Micromass GCT-MS

USTC-MASS CA064

20-Apr-2010 08:21:20  
RES=7000 half peak=0.0876  
TOF MS EI+  
1.09e4

Deleted:

20100420-B-2BR-1-ei+ 215 (3.583) Cm (214:215-1005:1107)

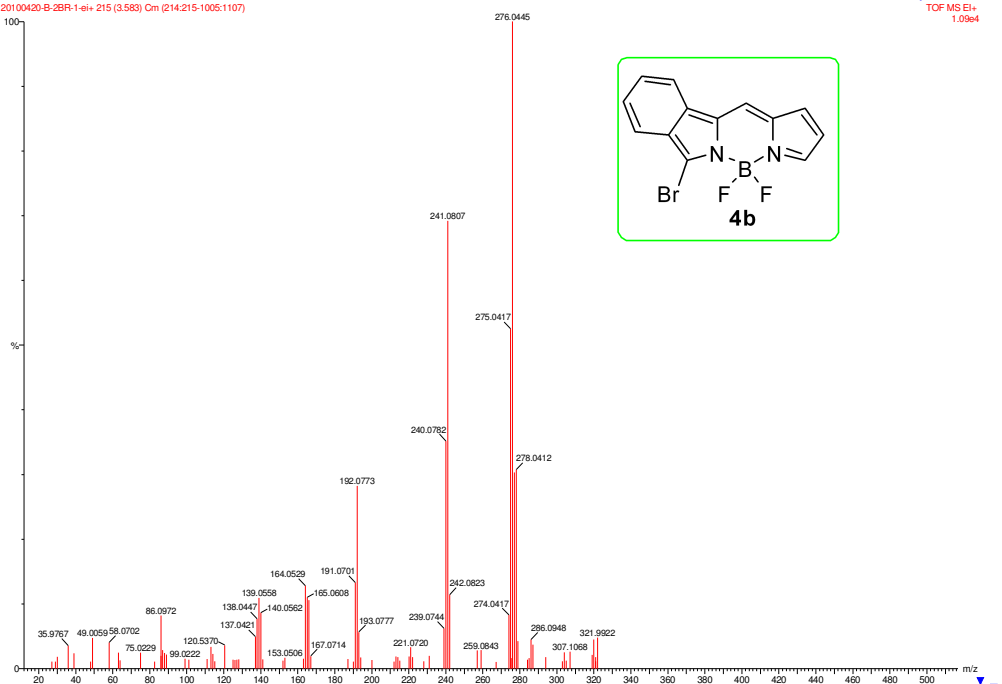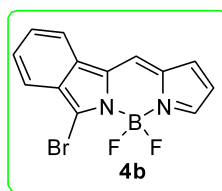



20100419-B-1CL-1-el+ 195 (3.250) Cm (193:195-1035:1159)

RES=7000 half peak=0.0676  
TOF MS EI+  
5.26e3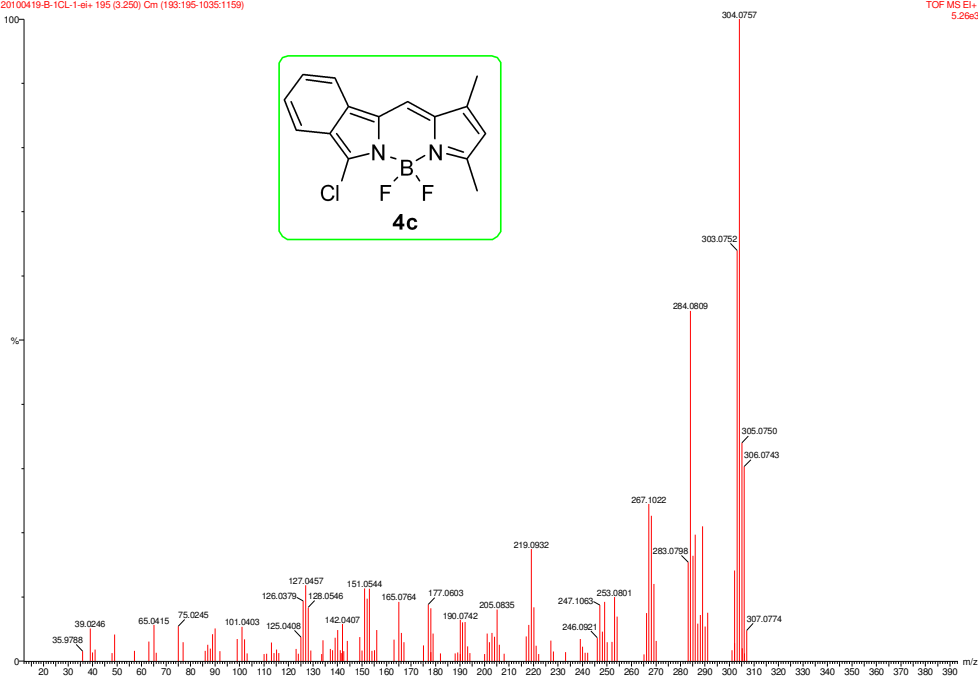



20100419-B-1BR-1-el+ 182 (3.033) Cm (177:182-868:939)

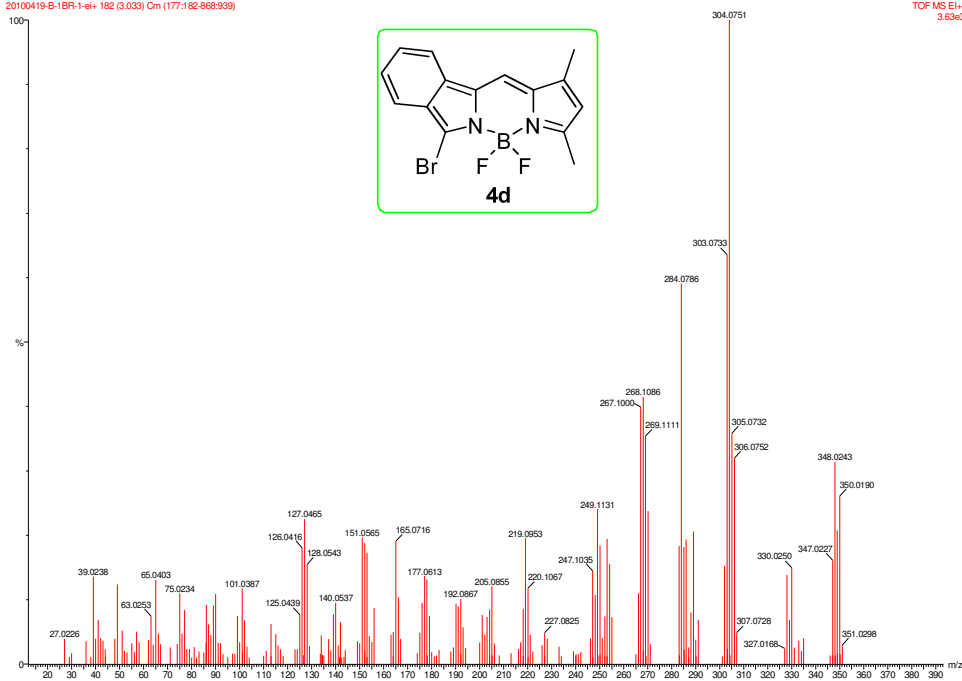



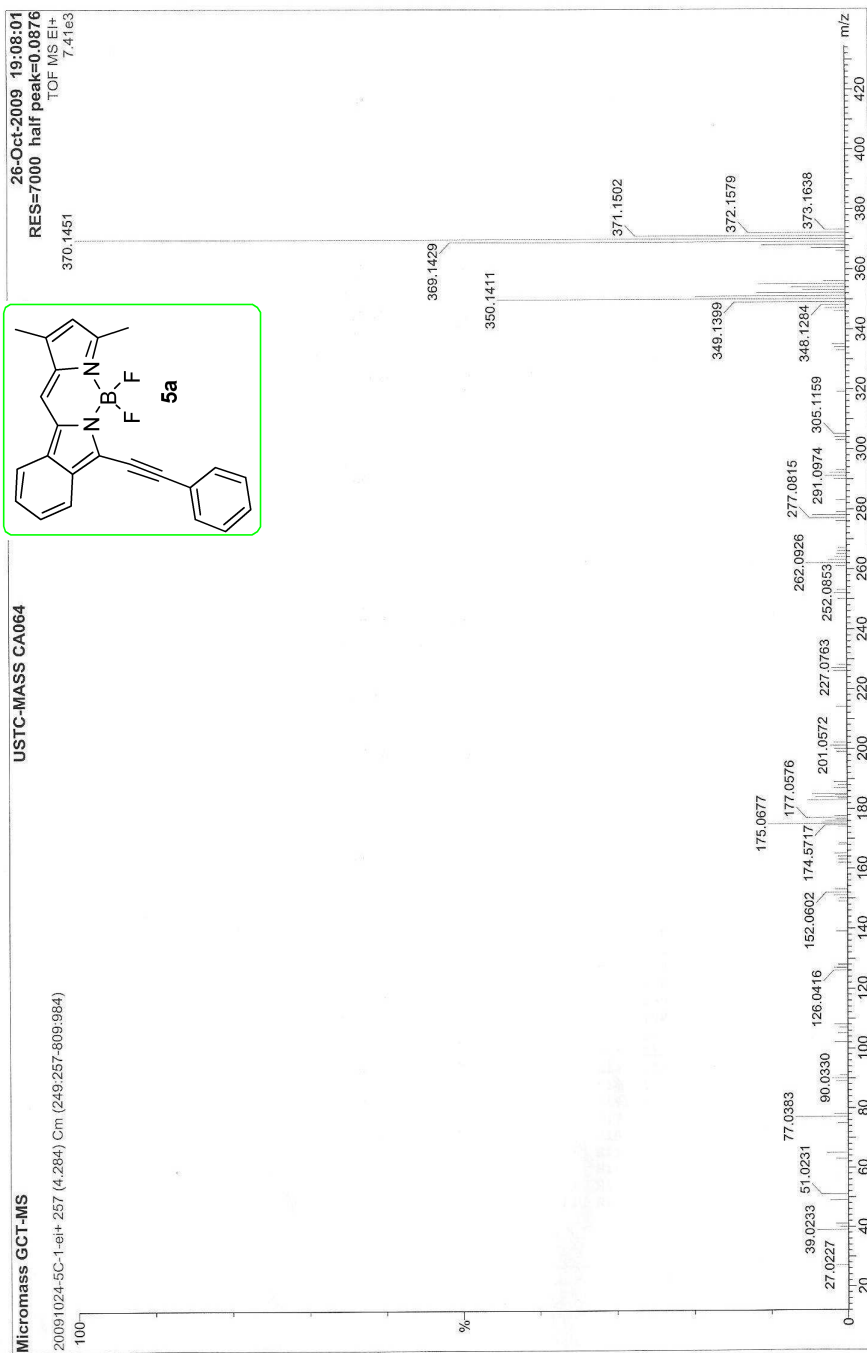



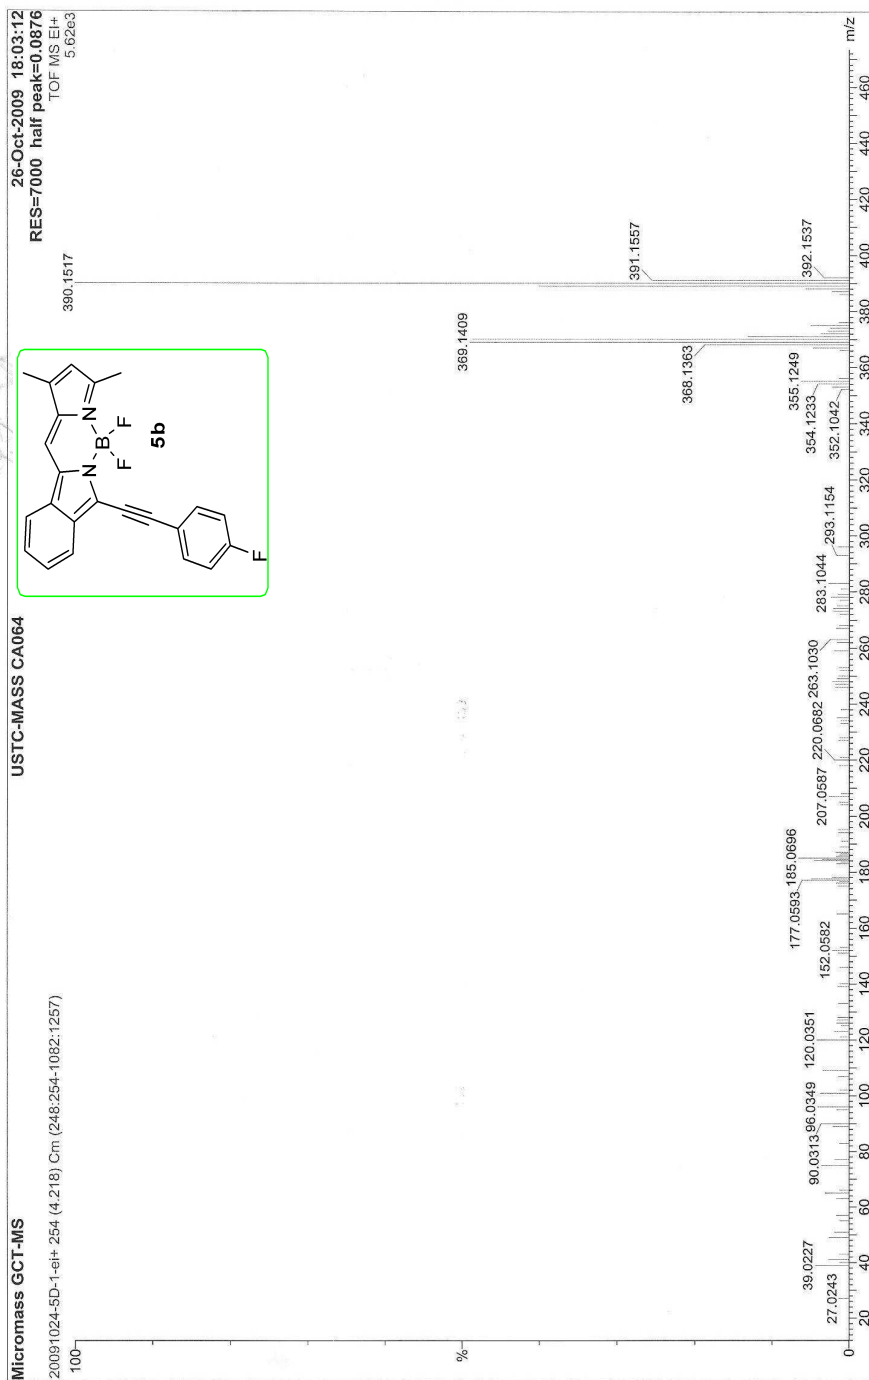



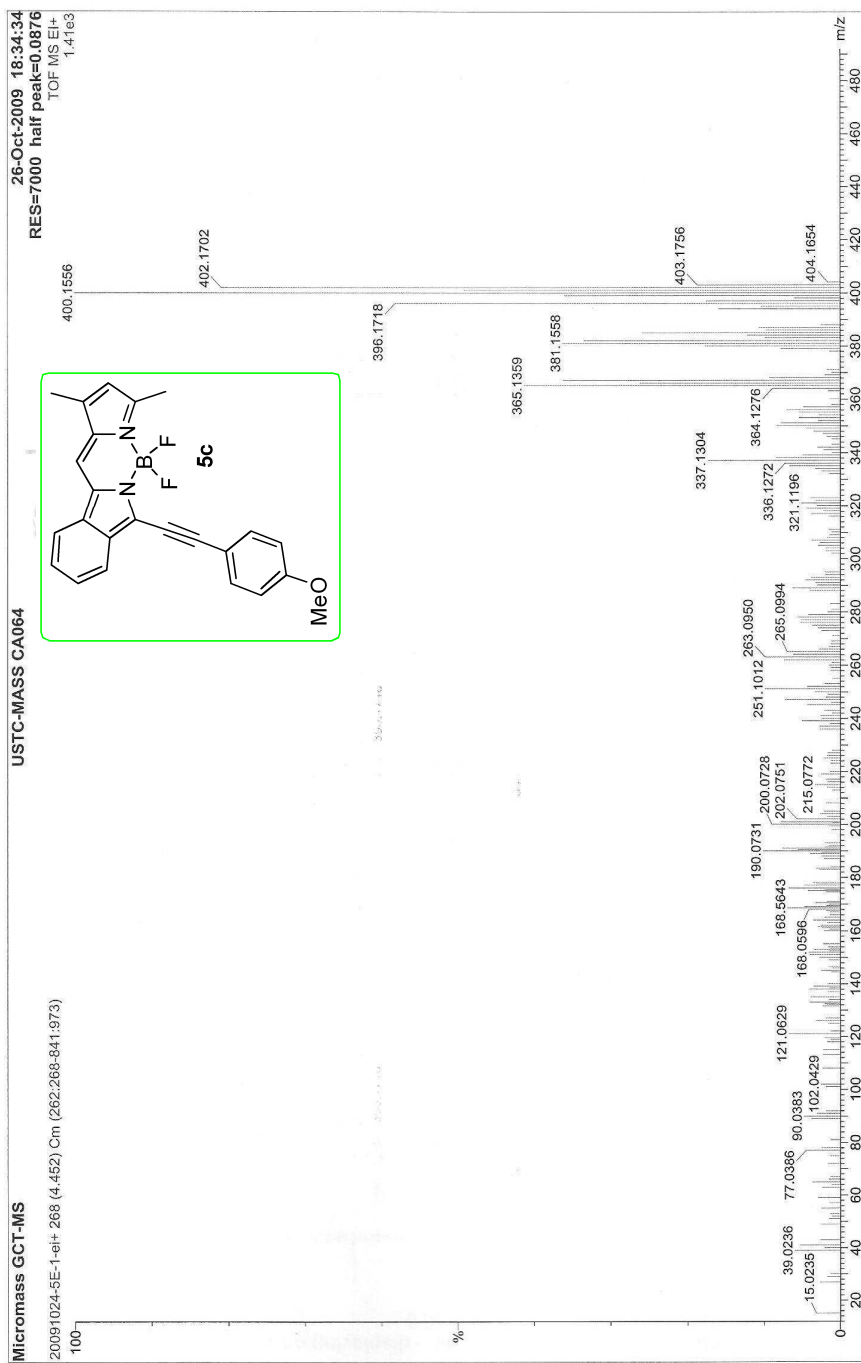



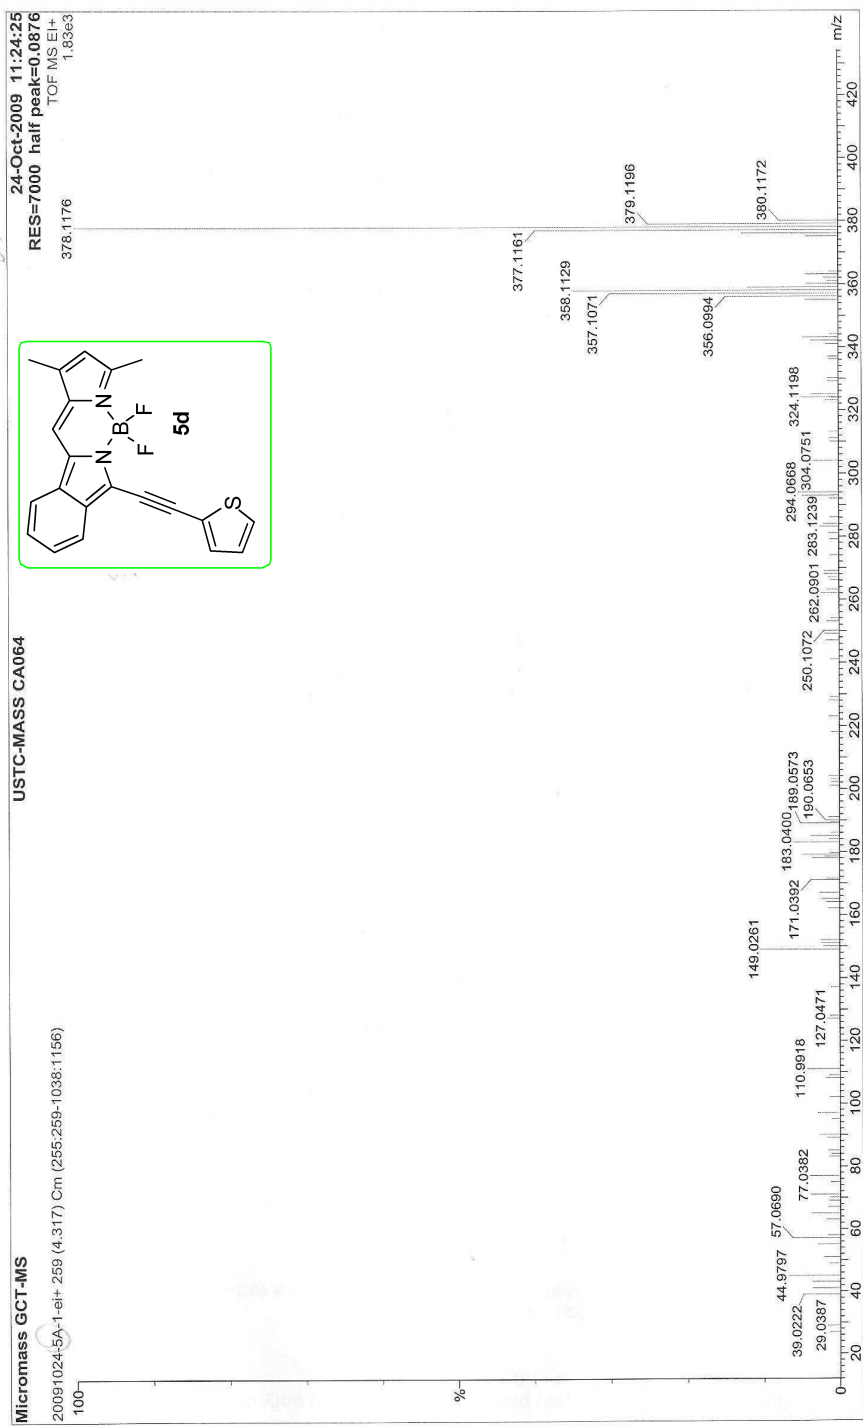



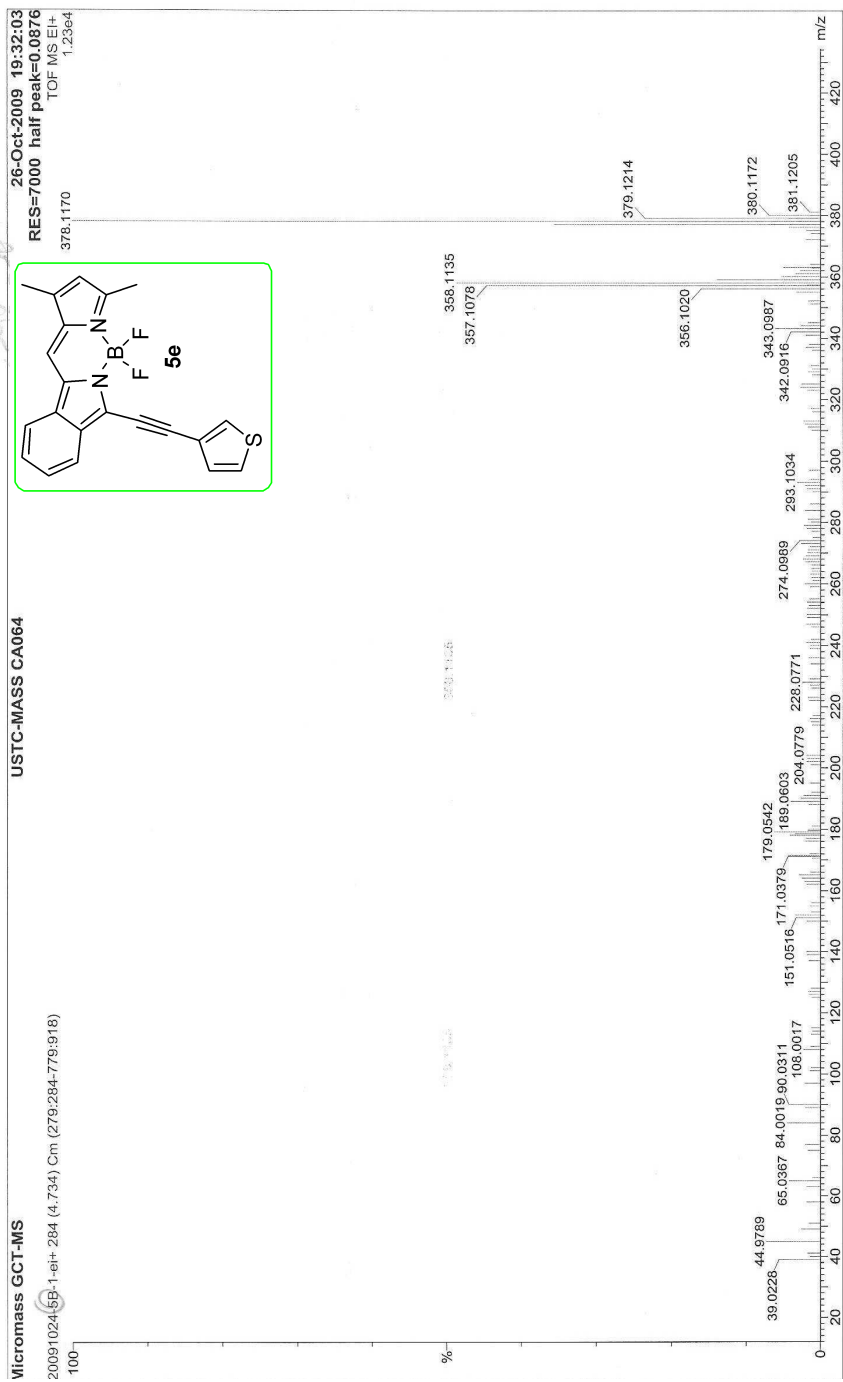



Micromass GCT-MS

20091024-6B-1-el+ 233 (3.868) Cm (223:233-762.863)

USTC-MASS CA064

24-Oct-2009 10:35:41  
RES=7000 half peak=0.0871  
TOF MS EI+  
9.13e5

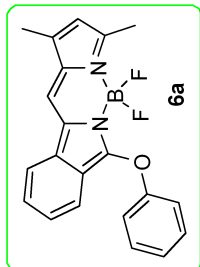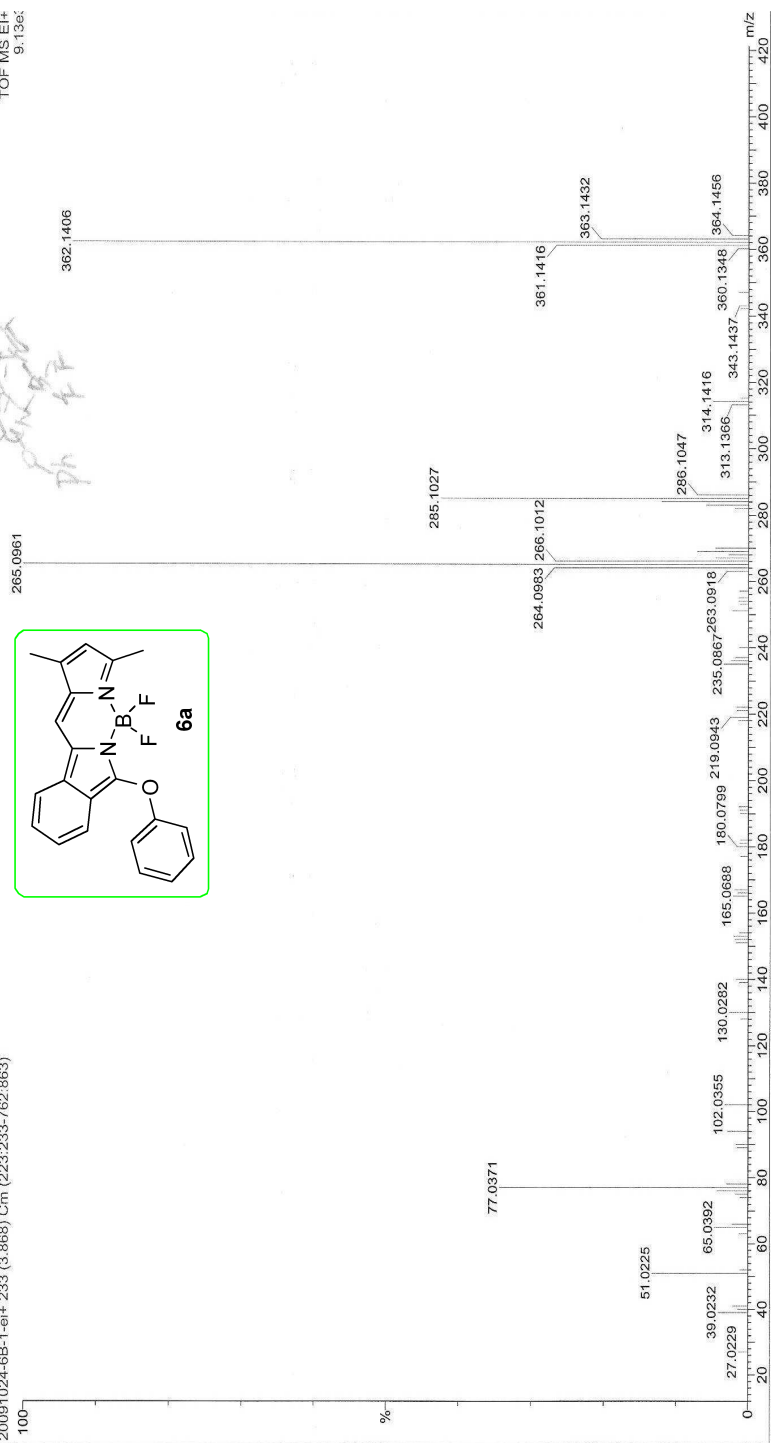



Micromass GCT-MS

USTC-MASS CA064

19-Apr-2010 11:19:11  
RES=7000 half peak=0.0676  
TOF MS E1+  
3.59e3

20100419-B-7C-1-el+ 191 (3.183) Cm (190:191-824.936)

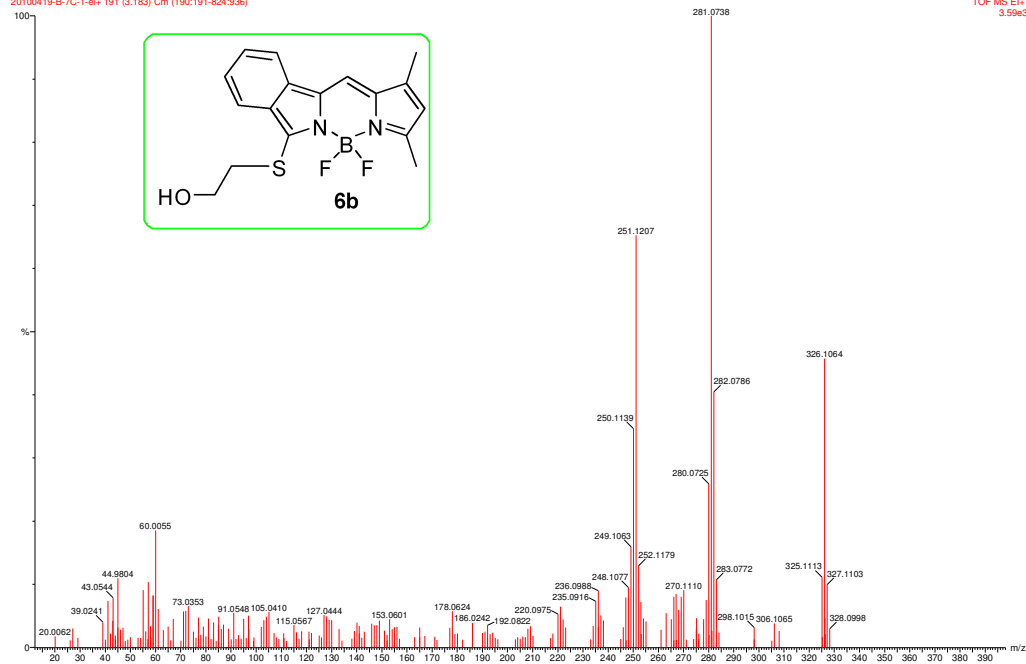



20100420-B-7F-1-el+ 185 (3.084) Cm (181:185-888:991)

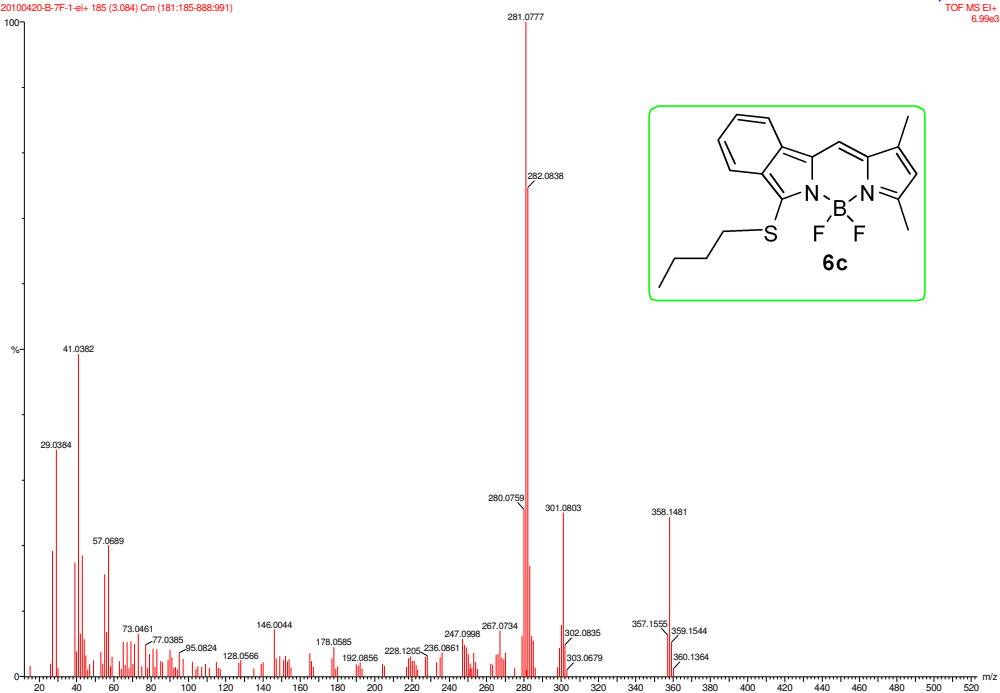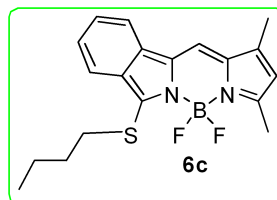



20100420-B-7A-1-el+ 196 (3.296) On (194:195-998:1081)

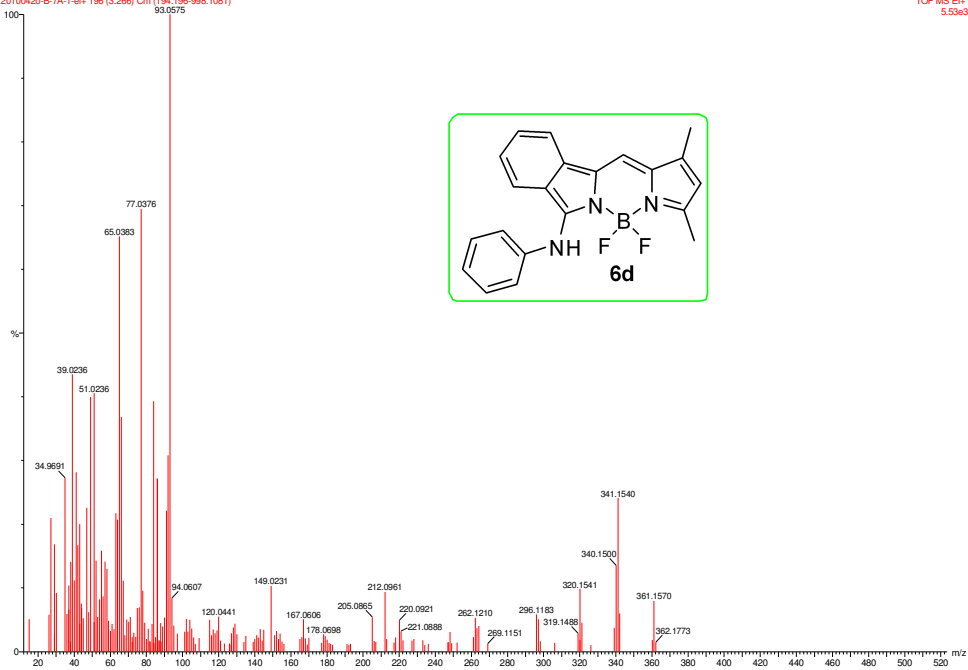



20100419-B-7D-1-ei+ 278 (4.634) Cm (266:280-975:1092)

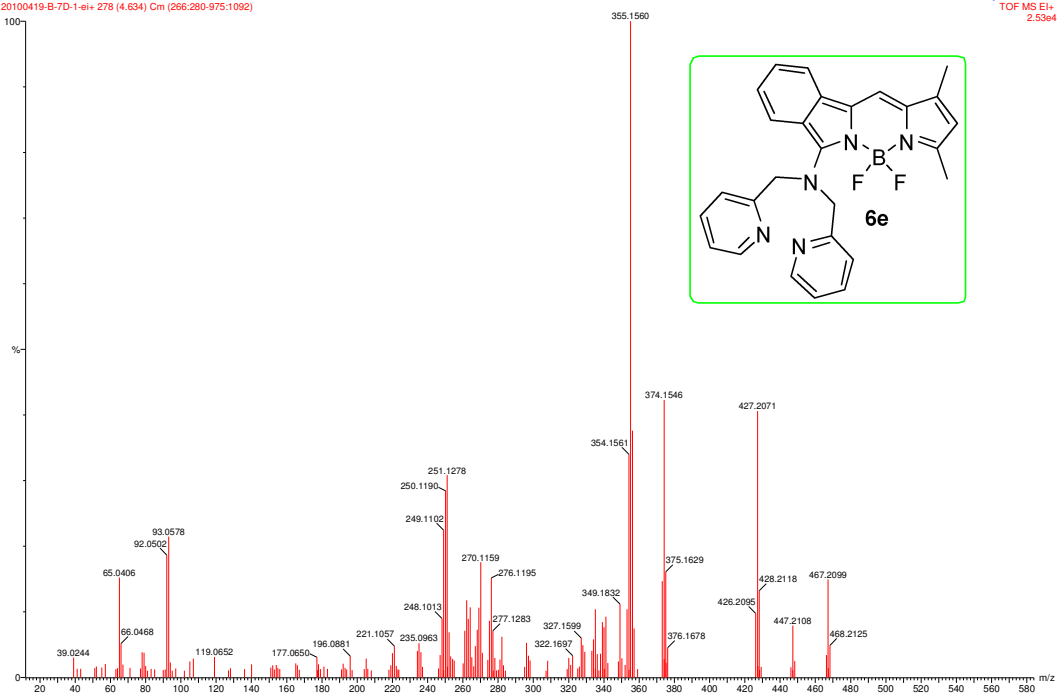



20100419-B-7E-1-el+ 285 (4.767) Cm (286:(362:366+902:1036))

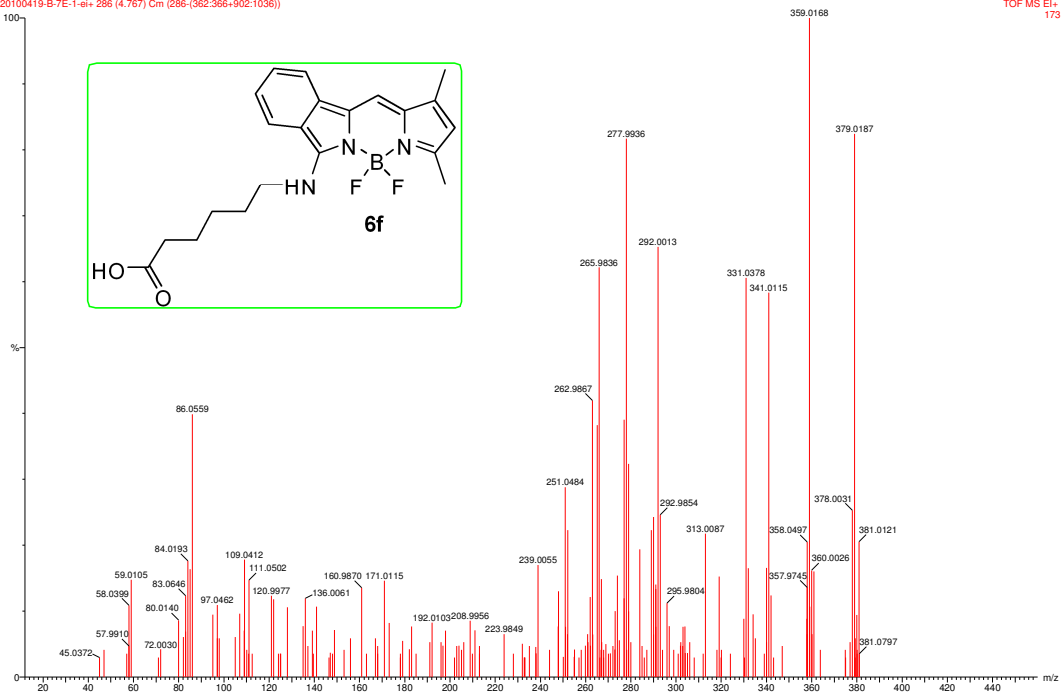



## 5. UV-vis and Fluorescence data for all the new compounds

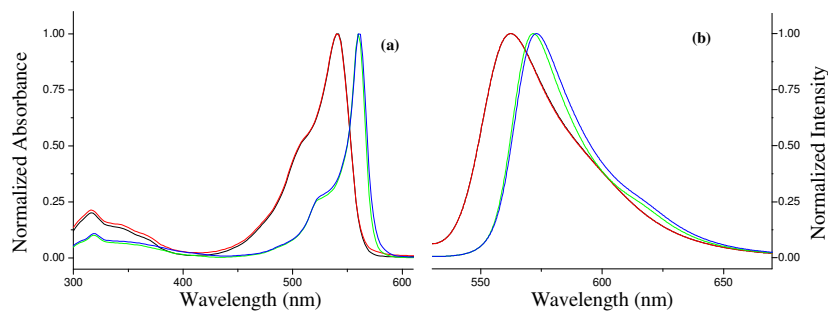

**Figure S1.** Normalized UV-vis (a) and Fluorescence (b,  $\lambda_{\text{ex}} = 520$  nm) spectra of BODIPYs **4a** (black), **4b** (red), **4c** (green) and **4d** (blue) in dichloromethane at 25 °C.

**Table S1.** UV-vis and fluorescence properties of compounds **4a-d** in various solvent at room temperature.

| BODIPYs   |         | $\lambda_{\text{max}}$<br>(nm) | Log $\epsilon$ | $\lambda_{\text{em}}$<br>(nm) | $\phi^a$ | Stokes shift<br>( $\text{cm}^{-1}$ ) |
|-----------|---------|--------------------------------|----------------|-------------------------------|----------|--------------------------------------|
| <b>4a</b> | MeOH    | 536                            | 4.73           | 558                           | 0.85     | 736                                  |
|           | DMSO    | 542                            | 4.48           | 566                           | 0.59     | 782                                  |
|           | Toluene | 544                            | 4.76           | 564                           | 0.69     | 652                                  |
|           | MeCN    | 532                            | 4.81           | 558                           | 0.68     | 876                                  |
|           | Hexane  | 540                            | 4.91           | 554                           | 0.72     | 468                                  |
| <b>4b</b> | MeOH    | 536                            | 4.84           | 559                           | 0.66     | 768                                  |
|           | DMSO    | 542                            | 4.78           | 566                           | 0.42     | 782                                  |
|           | Toluene | 544                            | 4.90           | 564                           | 0.66     | 652                                  |
|           | MeCN    | 534                            | 4.75           | 559                           | 0.69     | 838                                  |
|           | Hexane  | 540                            | 4.76           | 554                           | 1.00     | 468                                  |
| <b>4c</b> | MeOH    | 554                            | 4.87           | 566                           | 0.81     | 383                                  |
|           | DMSO    | 560                            | 4.75           | 572                           | 0.69     | 375                                  |
|           | Toluene | 562                            | 4.95           | 574                           | 0.63     | 372                                  |
|           | MeCN    | 554                            | 4.92           | 566                           | 0.67     | 383                                  |
|           | Hexane  | 556                            | 5.15           | 566                           | 0.73     | 318                                  |
| <b>4d</b> | MeOH    | 556                            | 4.61           | 572                           | 0.61     | 503                                  |
|           | DMSO    | 560                            | 4.38           | 573                           | 0.59     | 405                                  |
|           | Toluene | 562                            | 5.05           | 575                           | 0.48     | 402                                  |
|           | MeCN    | 554                            | 4.95           | 567                           | 0.64     | 414                                  |
|           | Hexane  | 558                            | 5.17           | 567                           | 0.59     | 284                                  |

<sup>a</sup>Fluorescence quantum yields for BODIPYs **4a-d** ( $\lambda_{\text{ex}} = 520$  nm) were calculated using Rhodamin B (0.49 in EtOH)<sup>1c</sup> as the reference.



**Table S2.** UV-vis and fluorescence properties of compounds **5a-e** in various solvent at room temperature.

| BODIPYs   |         | $\lambda_{\text{max}}$<br>(nm) | $\text{Log}\epsilon_{\text{max}}$ | $\lambda_{\text{em}}$<br>(nm) | $\phi^a$ | Stokes shift<br>( $\text{cm}^{-1}$ ) |
|-----------|---------|--------------------------------|-----------------------------------|-------------------------------|----------|--------------------------------------|
| <b>5a</b> | DMSO    | 614                            | 4.62                              | 632                           | 0.61     | 464                                  |
|           | MeOH    | 606                            | 4.69                              | 622                           | 0.84     | 424                                  |
|           | Toluene | 616                            | 4.73                              | 631                           | 0.63     | 386                                  |
|           | MeCN    | 606                            | 4.68                              | 622                           | 1.00     | 424                                  |
|           | Hexane  | 608                            | 4.60                              | 620                           | 1.00     | 318                                  |
| <b>5b</b> | DMSO    | 614                            | 4.77                              | 627                           | 0.64     | 338                                  |
|           | MeOH    | 606                            | 4.77                              | 617                           | 1.00     | 294                                  |
|           | Toluene | 614                            | 4.81                              | 627                           | 0.68     | 338                                  |
|           | MeCN    | 604                            | 4.74                              | 618                           | 1.00     | 375                                  |
|           | Hexane  | 608                            | 4.87                              | 617                           | 1.00     | 240                                  |
| <b>5c</b> | DMSO    | 618                            | 4.32                              | 636                           | 0.47     | 458                                  |
|           | MeOH    | 610                            | 4.58                              | 625                           | 0.68     | 393                                  |
|           | Toluene | 618                            | 4.62                              | 635                           | 0.52     | 433                                  |
|           | MeCN    | 608                            | 4.56                              | 626                           | 0.83     | 473                                  |
|           | Hexane  | 610                            | 4.55                              | 624                           | 0.91     | 368                                  |
| <b>5d</b> | DMSO    | 618                            | 4.21                              | 632                           | 0.61     | 358                                  |
|           | MeOH    | 610                            | 4.15                              | 624                           | 0.39     | 368                                  |
|           | Toluene | 618                            | 4.15                              | 633                           | 0.33     | 383                                  |
|           | MeCN    | 608                            | 4.14                              | 623                           | 0.51     | 396                                  |
|           | Hexane  | 610                            | 4.42                              | 622                           | 0.49     | 316                                  |
| <b>5e</b> | DMSO    | 614                            | 4.82                              | 631                           | 0.32     | 439                                  |
|           | MeOH    | 606                            | 5.00                              | 621                           | 0.90     | 399                                  |
|           | Toluene | 614                            | 5.09                              | 630                           | 0.65     | 414                                  |
|           | MeCN    | 606                            | 5.01                              | 621                           | 1.00     | 399                                  |
|           | Hexane  | 608                            | 4.40                              | 619                           | 1.00     | 292                                  |

<sup>a</sup>Fluorescence quantum yields for BODIPYs **5a-e** ( $\lambda_{\text{ex}} = 580 \text{ nm}$ ) were calculated using methylene blue (0.03 in MeOH)<sup>1a</sup> as the reference.



**Table S3.** UV-vis and fluorescence properties of compounds **6a-f** in various solvent at room temperature.

| BODIPYs   |         | $\lambda_{\text{max}}$<br>(nm) | Log $\epsilon$ | $\lambda_{\text{em}}$<br>(nm) | $\phi^a$ | Stokes shift<br>(cm <sup>-1</sup> ) |
|-----------|---------|--------------------------------|----------------|-------------------------------|----------|-------------------------------------|
| <b>6a</b> | DMSO    | 544                            | 4.96           | 564                           | 0.56     | 652                                 |
|           | MeOH    | 540                            | 4.92           | 559                           | 0.24     | 629                                 |
|           | Toluene | 550                            | 5.07           | 566                           | 0.63     | 514                                 |
|           | MeCN    | 538                            | 5.01           | 559                           | 0.66     | 698                                 |
|           | Hexane  | 546                            | 5.23           | 557                           | 0.70     | 362                                 |
| <b>6b</b> | DMSO    | 574                            | 4.37           | 589                           | 0.38     | 444                                 |
|           | MeOH    | 570                            | 4.92           | 584                           | 0.57     | 421                                 |
|           | Toluene | 578                            | 4.48           | 592                           | 0.37     | 409                                 |
|           | MeCN    | 568                            | 5.01           | 583                           | 0.45     | 453                                 |
|           | Hexane  | 572                            | 5.23           | 584                           | 0.44     | 359                                 |
| <b>6c</b> | DMSO    | 574                            | 4.77           | 591                           | 0.52     | 501                                 |
|           | MeOH    | 570                            | 4.58           | 585                           | 0.73     | 450                                 |
|           | Toluene | 578                            | 4.54           | 594                           | 0.50     | 466                                 |
|           | MeCN    | 568                            | 4.55           | 584                           | 0.56     | 482                                 |
|           | Hexane  | 572                            | 4.55           | 588                           | 0.56     | 476                                 |
| <b>6d</b> | DMSO    | 516                            | 4.75           | 585                           | 0.19     | 2286                                |
|           | MeOH    | 518                            | 4.53           | 576                           | 0.51     | 1944                                |
|           | Toluene | 540                            | 4.66           | 583                           | 0.55     | 1366                                |
|           | MeCN    | 512                            | 4.49           | 578                           | 0.57     | 2230                                |
|           | Hexane  | 540                            | 4.51           | 573                           | 0.56     | 1067                                |
| <b>6e</b> | DMSO    | 534                            | 4.49           | 586                           | 0.56     | 1662                                |
|           | MeOH    | 548                            | 4.50           | 581                           | 0.63     | 1036                                |
|           | Toluene | 558                            | 4.61           | 587                           | 0.54     | 1585                                |
|           | MeCN    | 532                            | 4.51           | 581                           | 0.51     | 1585                                |
|           | Hexane  | 558                            | 4.75           | 579                           | 0.61     | 650                                 |
| <b>6f</b> | MeOH    | 510                            | 4.28           | 551                           | 0.24     | 1459                                |
|           | Toluene | 532                            | 4.34           | 564                           | 0.14     | 1066                                |
|           | MeCN    | 504                            | 4.28           | 554                           | 0.20     | 1791                                |
|           | Hexane  | 534                            | 4.03           | 554                           | 0.17     | 676                                 |

<sup>a</sup>Fluorescence quantum yields for BODIPYs **6a-e** ( $\lambda_{\text{ex}} = 520$  nm) were calculated using Rhodamin B (0.49 in EtOH)<sup>1c</sup> as the reference, while fluorescein (0.95 in 0.1 M NaOH)<sup>1b</sup> was used as the standard for BODIPY **6f** ( $\lambda_{\text{ex}} = 490$  nm).

#### References:

1. (a) Olmsted, J. *J. Phys. Chem.* **1979**, 83, 2581. (b) Fery-Forgues, S.; Lavabre, D. *J. Chem. Educ.* **1999**, 76, 1260. (c) Casey, K. G.; Quitevis, E. L. *J. Phys. Chem.* **1988**, 92, 6590.
2. Williams, A. T. R.; Winfield, S. A.; Miller, J. N. *Analyst* **1983**, 108, 1067.
3. Valeur B. *Molecular Fluorescence: Principles and Applications*; Wiley-VCH: Weinheim, Germany, 2002.
4. Bonnett, R.; McManus, K. A. *J. Chem. Soc., Perkin Trans. 1*, **1996**, 2461.
